# Supplementary material for: A comprehensive analysis of the Lactuca sativa, L. transcriptome during different stages of the compatible interaction with Rhizoctonia solani
Source: PubMed Central journal article supplement (PMC6510776; doi:10.1038/s41598-019-43706-5), 2019-05-10
Supplement: 41598_2019_43706_MOESM2_ESM.pdf [file 41598_2019_43706_MOESM2_ESM.pdf]

# A comprehensive analysis of the *Lactuca sativa*, L. transcriptome during different stages of the compatible interaction with *Rhizoctonia solani*

Bart Verwaaijen<sup>1,2,3</sup>, Daniel Wibberg<sup>1</sup>, Anika Winkler<sup>1</sup>, Rita Zrenner<sup>2</sup>, Hanna Bednarz<sup>1</sup>, Karsten Niehaus<sup>1</sup>, Rita Grosch<sup>2</sup>, Alfred Pühler<sup>1</sup>, Andreas Schlüter<sup>1\*</sup>

<sup>1</sup>Center for Biotechnology, Bielefeld University, Bielefeld, Germany

<sup>2</sup>Leibniz-Institute of Vegetable and Ornamental Crops (IGZ), Großbeeren, Germany

<sup>3</sup>Current address, department of Computational Biology, Bielefeld University, Bielefeld, Germany

## Table of contents:

Supplementary Figure S1

Supplementary Figure S2

Supplementary Figure S3

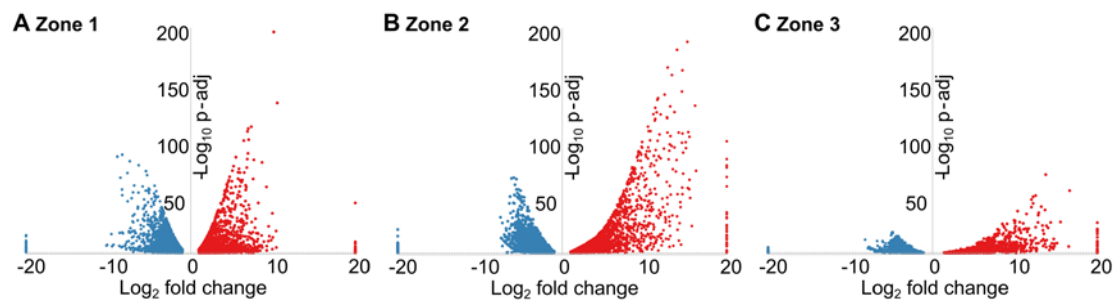

Supplementary Figure S1: DESeq based volcano plots depicting the differentially expressed genes of *L. sativa* between the interaction zones 1, 2 and 3 in comparison to the control (zone 4).

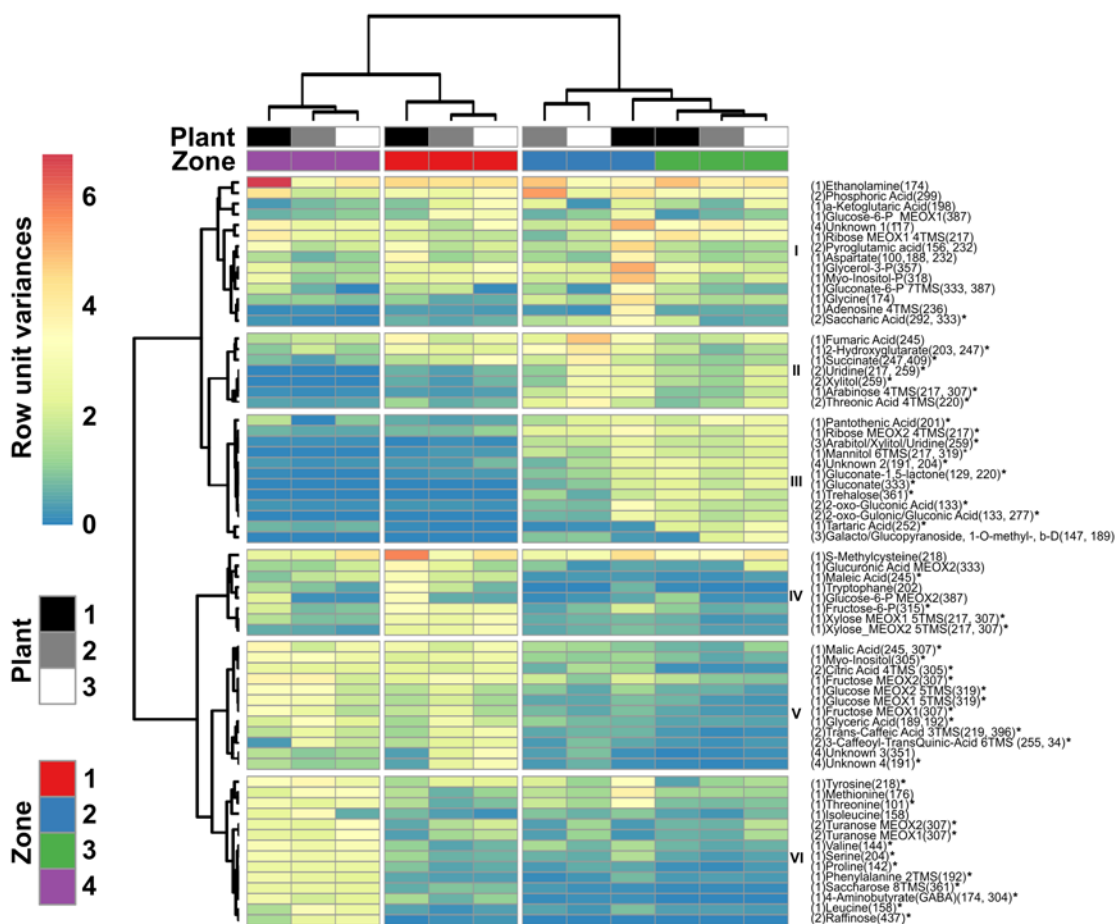

Supplementary Figure S2: Enlarged depiction of Figure 6B. Metabolite based heat map; unite variance scaling was applied on rows and Ward clustering was used for rows and columns<sup>31</sup>. The designations of single metabolites include the indicator of the level of identification within the first brackets, according to the reporting standards as proposed by the Metabolomics Standards Initiative<sup>41</sup> ranging from (1): identified by the measurement of the chemical reference standard, (2): putatively identified by significant database hit, (3) putatively characterized by database hit as compound of a certain chemical class, (4): unknown compound. The chemical name of the compound is accompanied in relevant cases by the information concerning the derivatization status (MEOX,TMS). The last brackets indicate the m/z values, which have been used for the identification and the integration of the signals corresponding to the given metabolite. The asterisks indicate significance as tested with ANOVA.

# KAAS Kegg mapping of *L. sativa* cv. Tizian DEG's

Only DEG's with p-adjusted values of 0.05 or smaller and absolute fold changes of 2 or higher are depicted

Log2 fold change

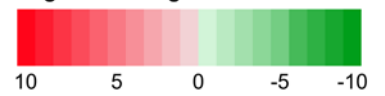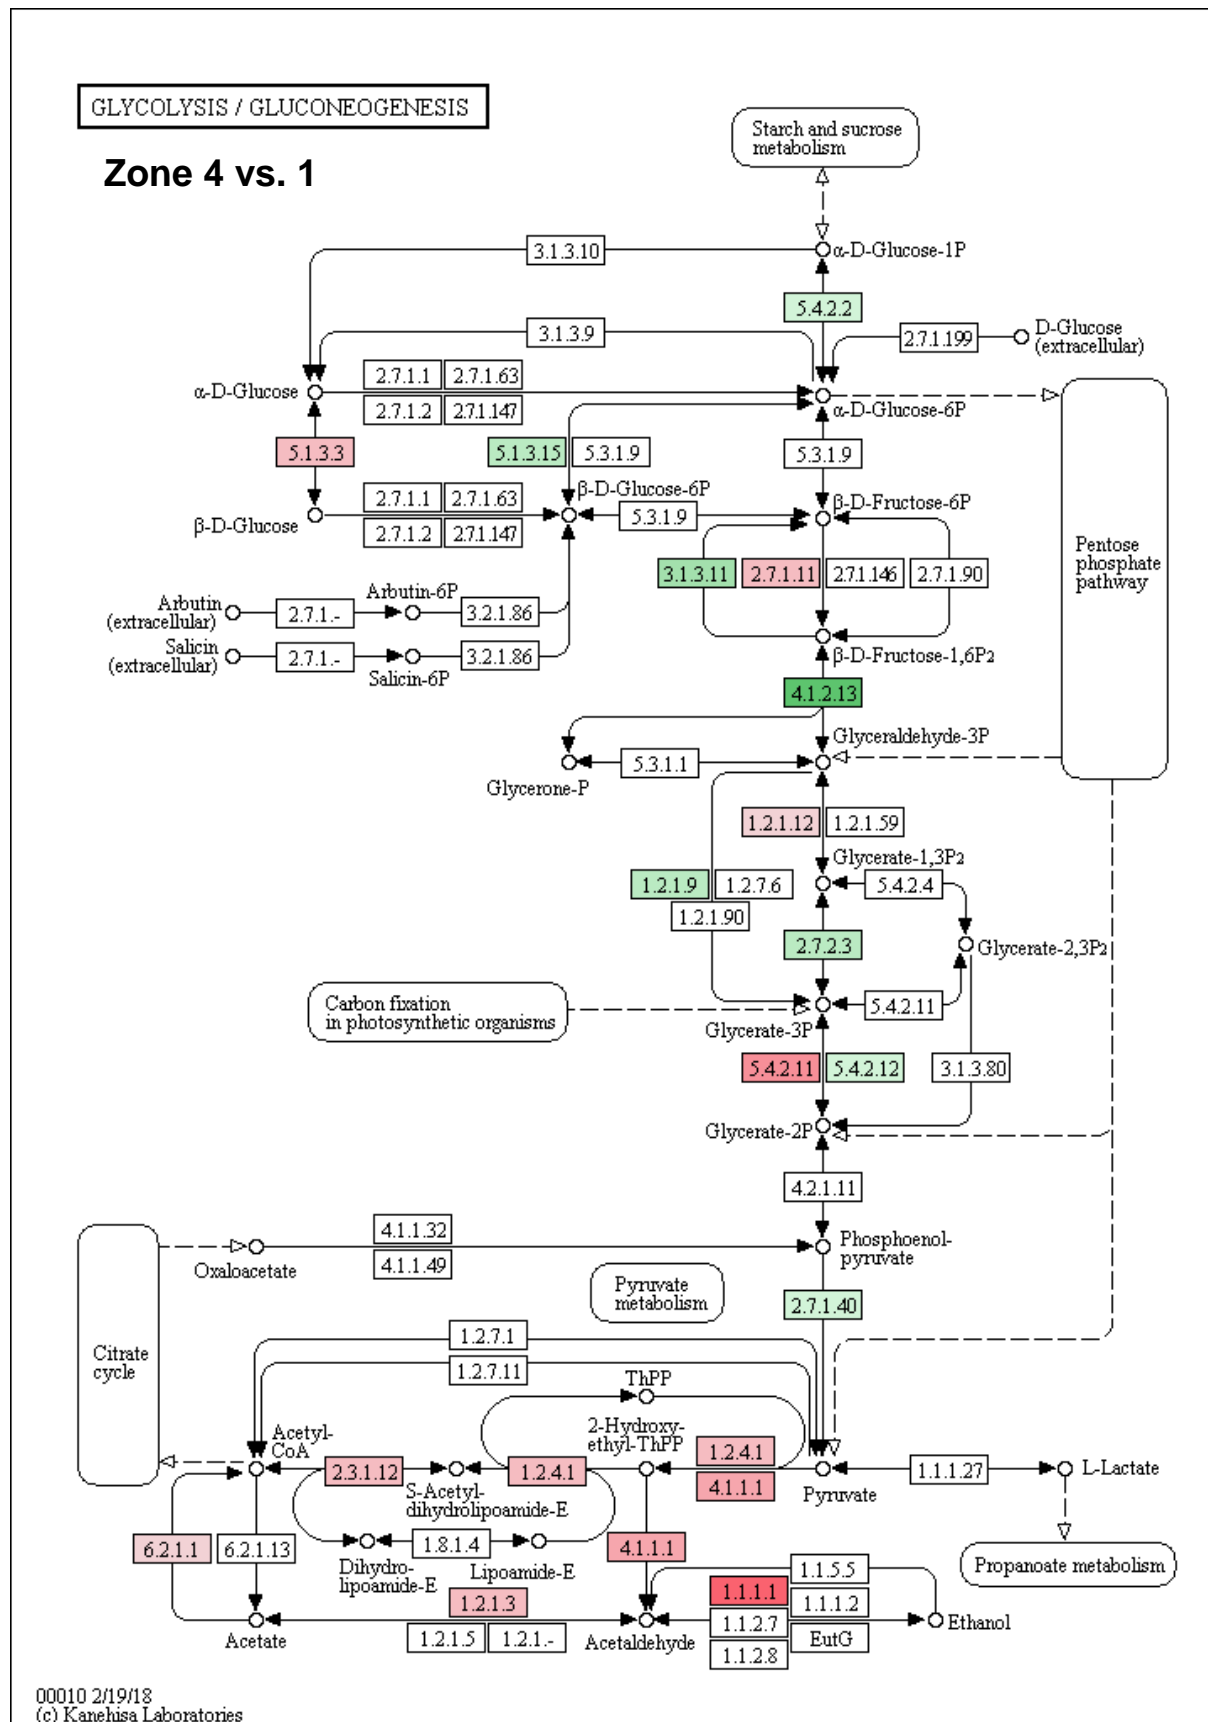

# KAAS Kegg mapping of *L. sativa* cv. Tizian DEG's

Only DEG's with p-adjusted values of 0.05 or smaller and absolute fold changes of 2 or higher are depicted

Log2 fold change



## GLYCOLYSIS / GLUCONEOGENESIS

### Zone 4 vs. 2

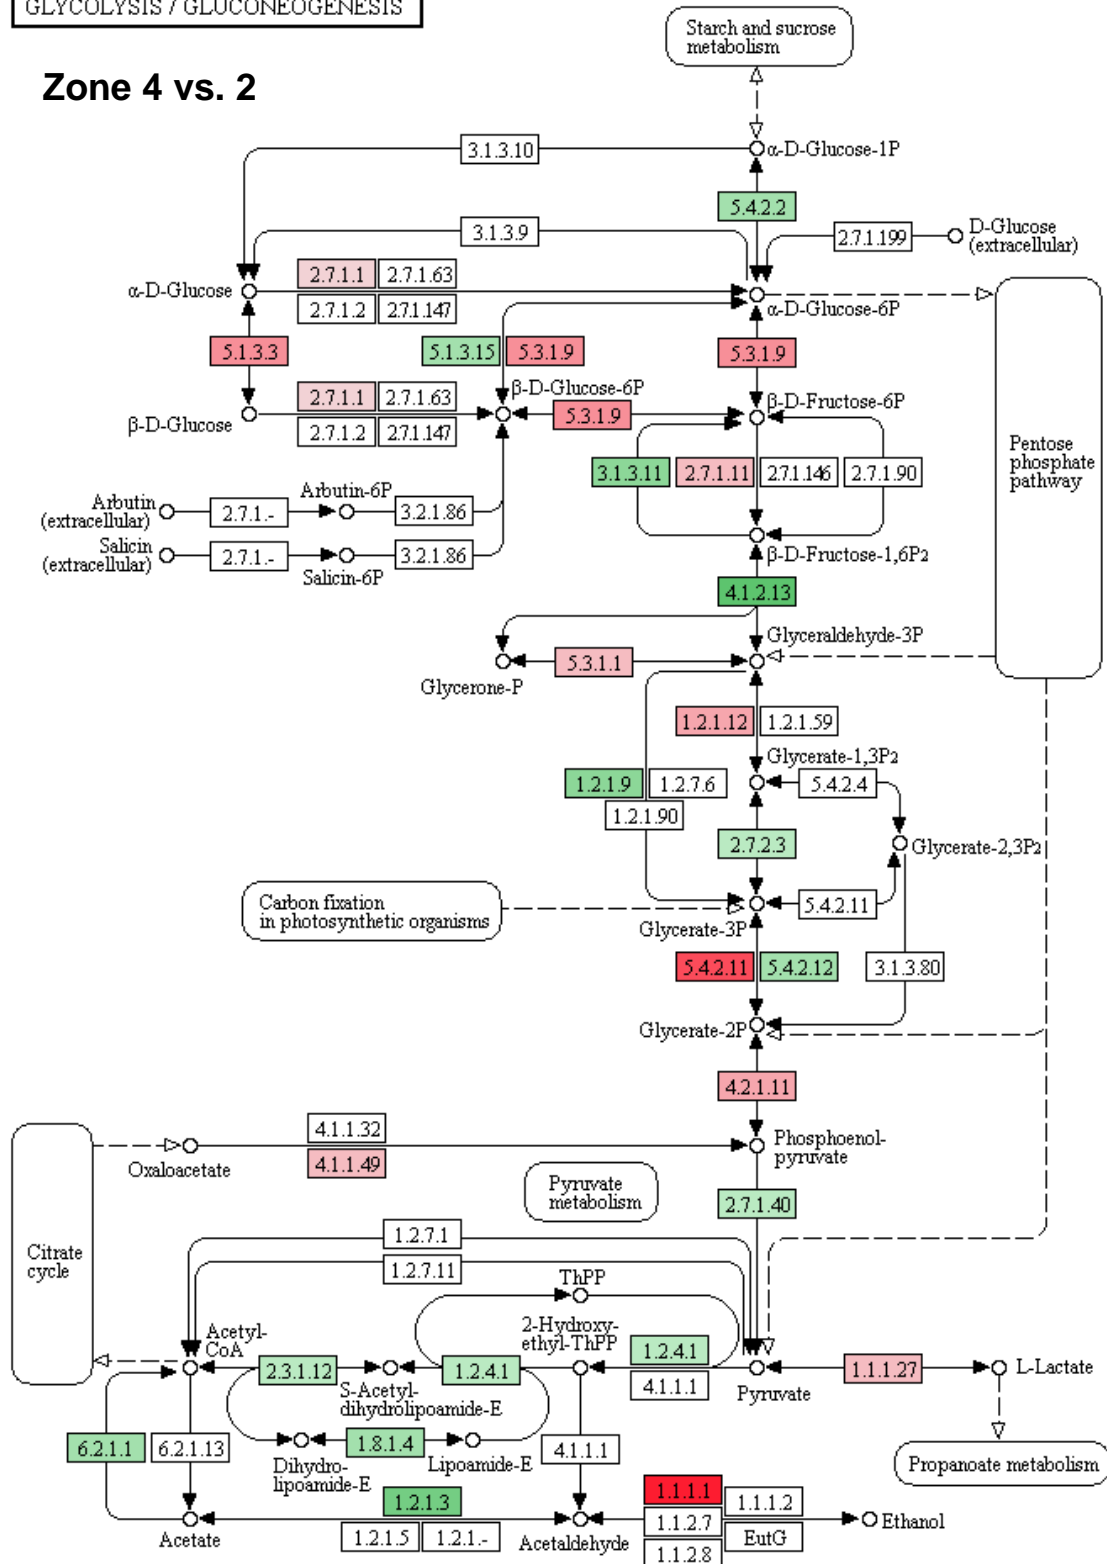

# KAAS Kegg mapping of *L. sativa* cv. Tizian DEG's

Only DEG's with p-adjusted values of 0.05 or smaller and absolute fold changes of 2 or higher are depicted

Log2 fold change

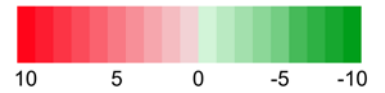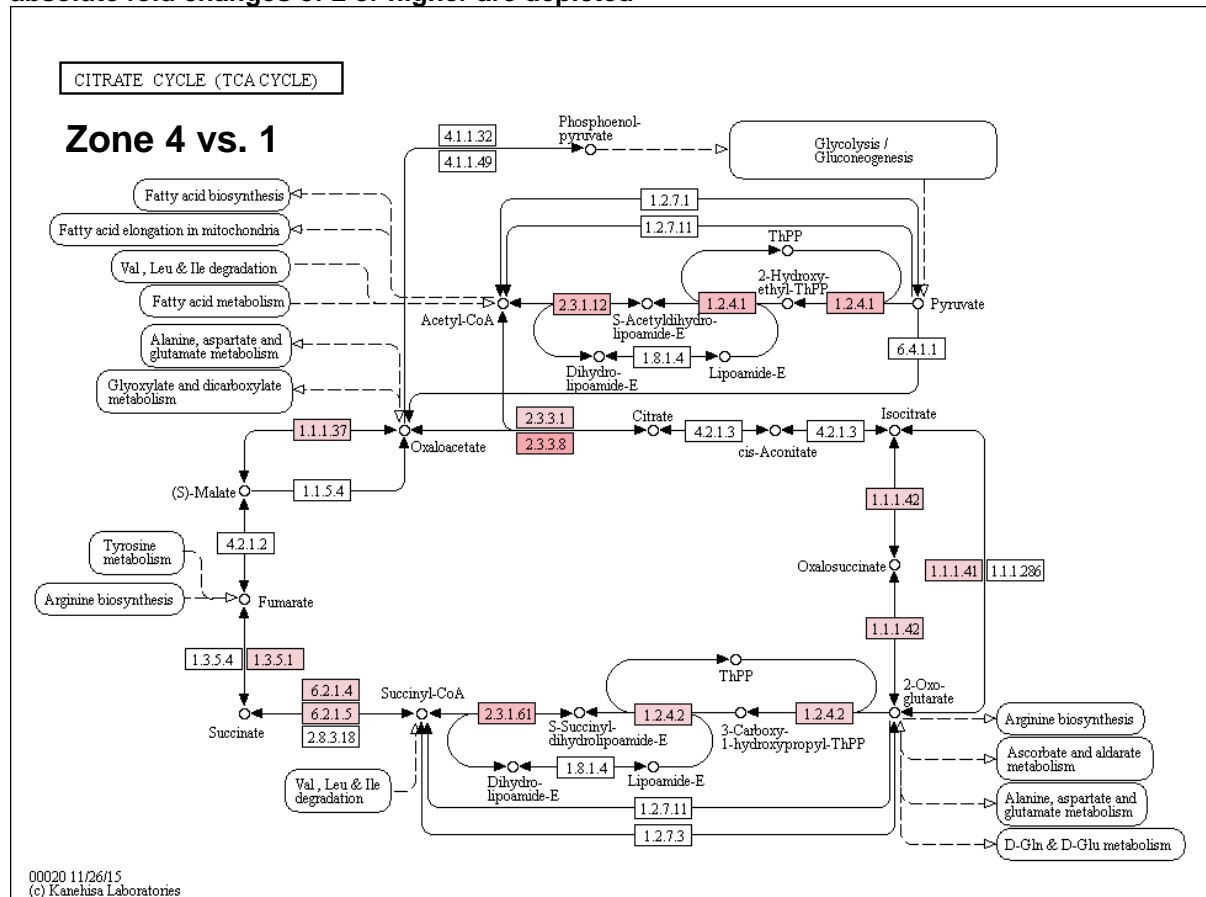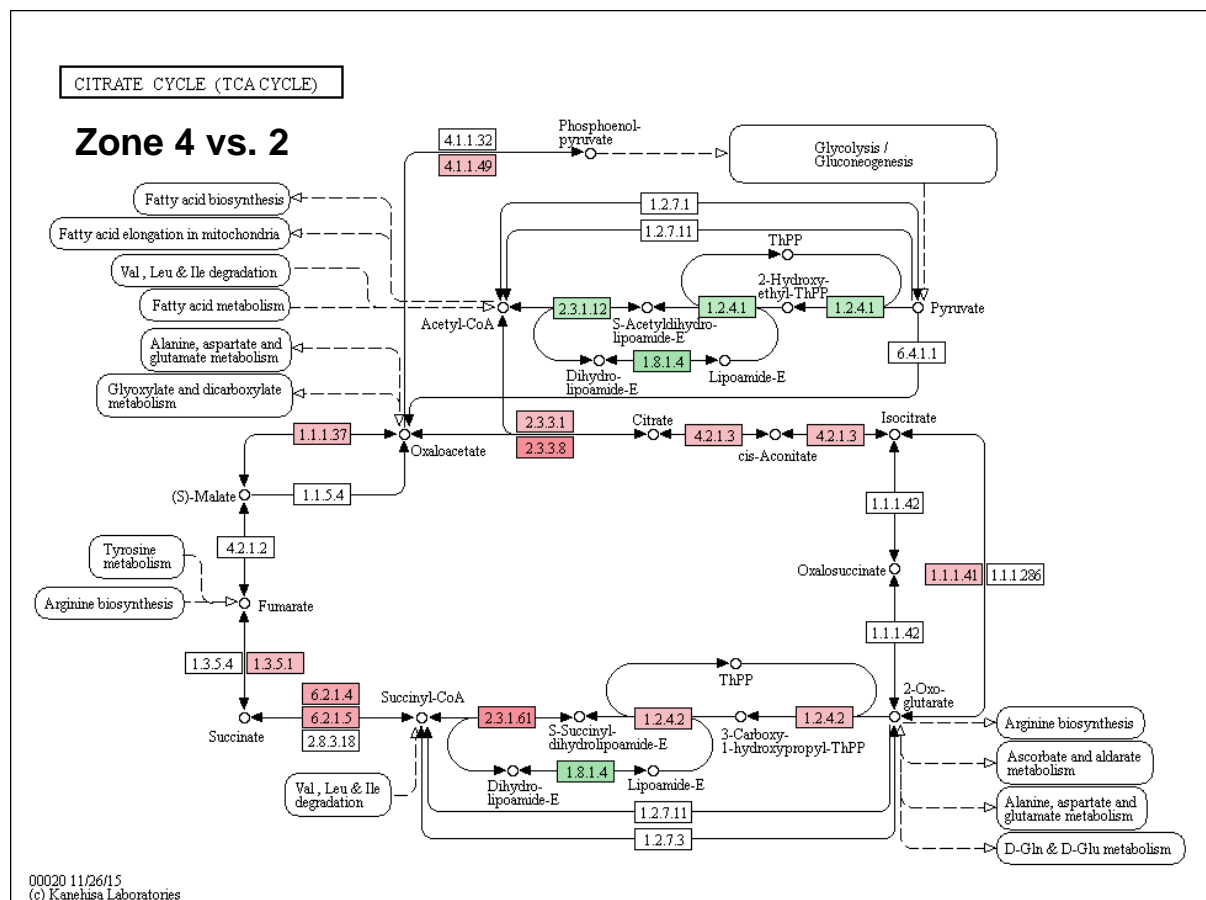

# KAAS Kegg mapping of *L. sativa* cv. Tizian DEG's

Only DEG's with p-adjusted values of 0.05 or smaller and absolute fold changes of 2 or higher are depicted

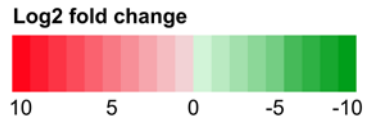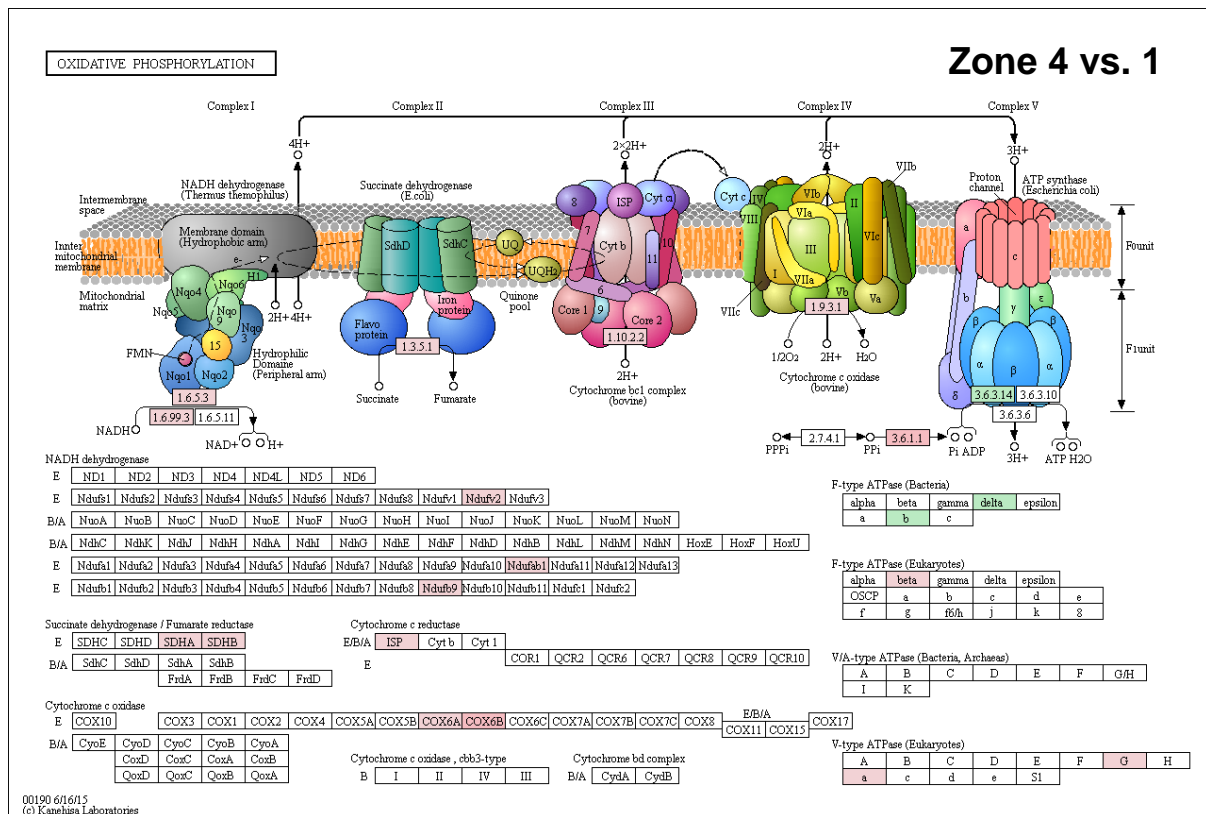

# KAAS Kegg mapping of *L. sativa* cv. Tizian DEG's

Only DEG's with p-adjusted values of 0.05 or smaller and absolute fold changes of 2 or higher are depicted

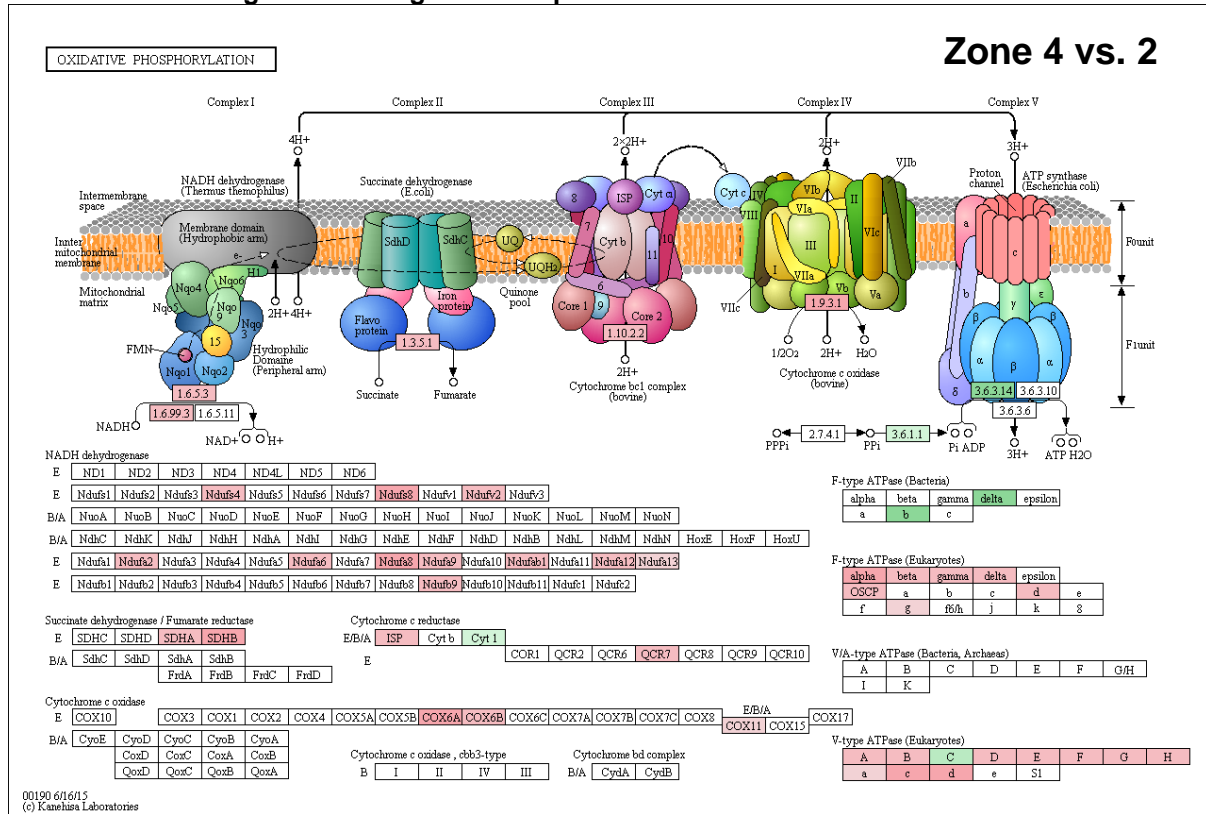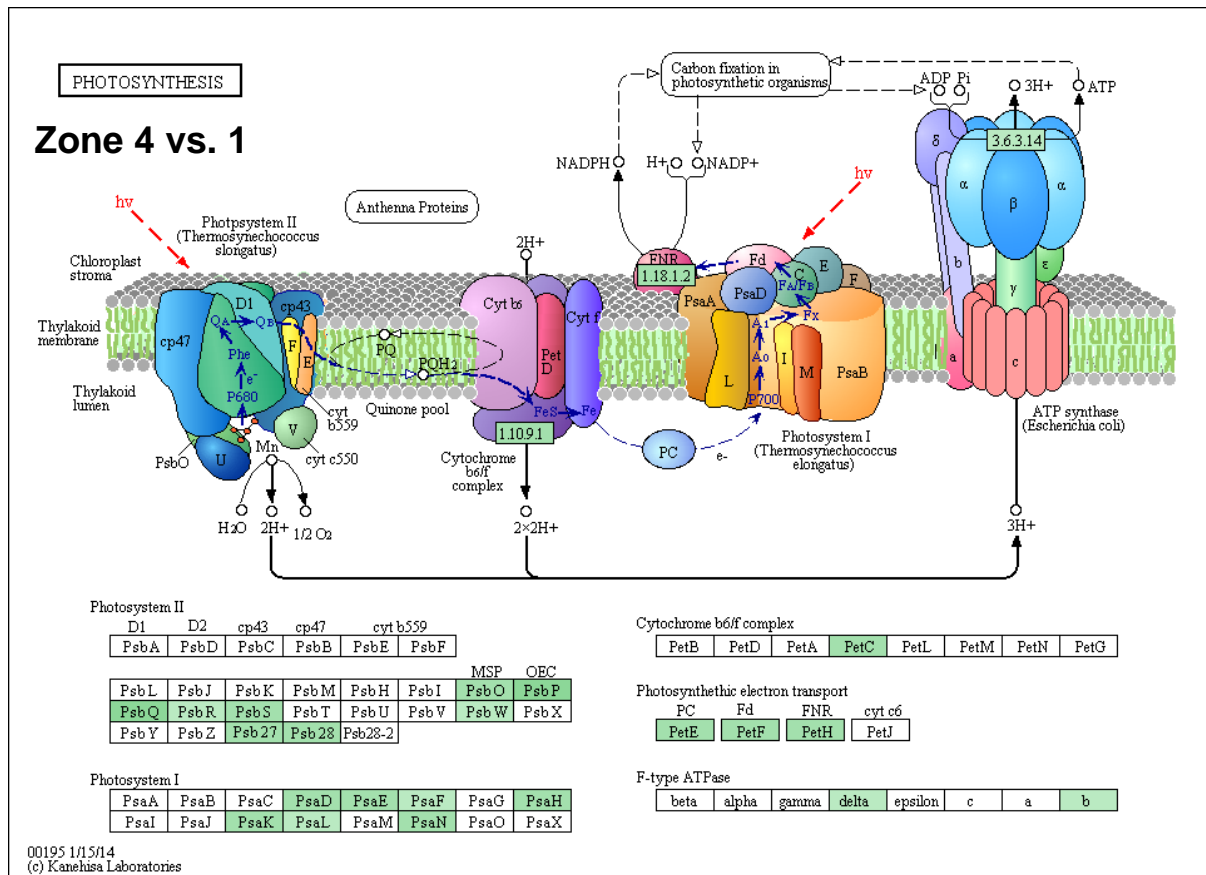

# KAAS Kegg mapping of *L. sativa* cv. Tizian DEG's

Only DEG's with p-adjusted values of 0.05 or smaller and absolute fold changes of 2 or higher are depicted

Log2 fold change

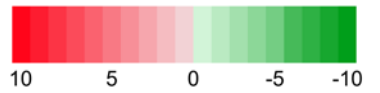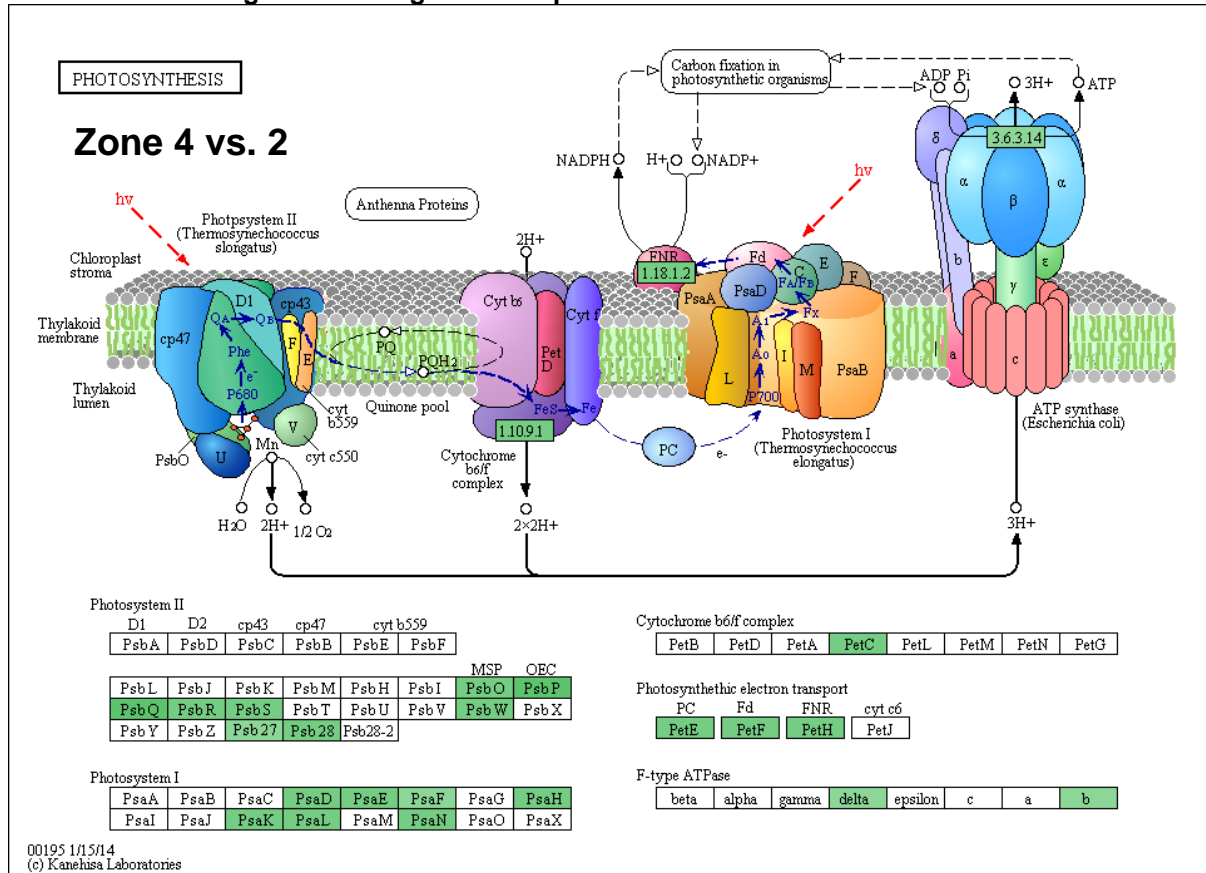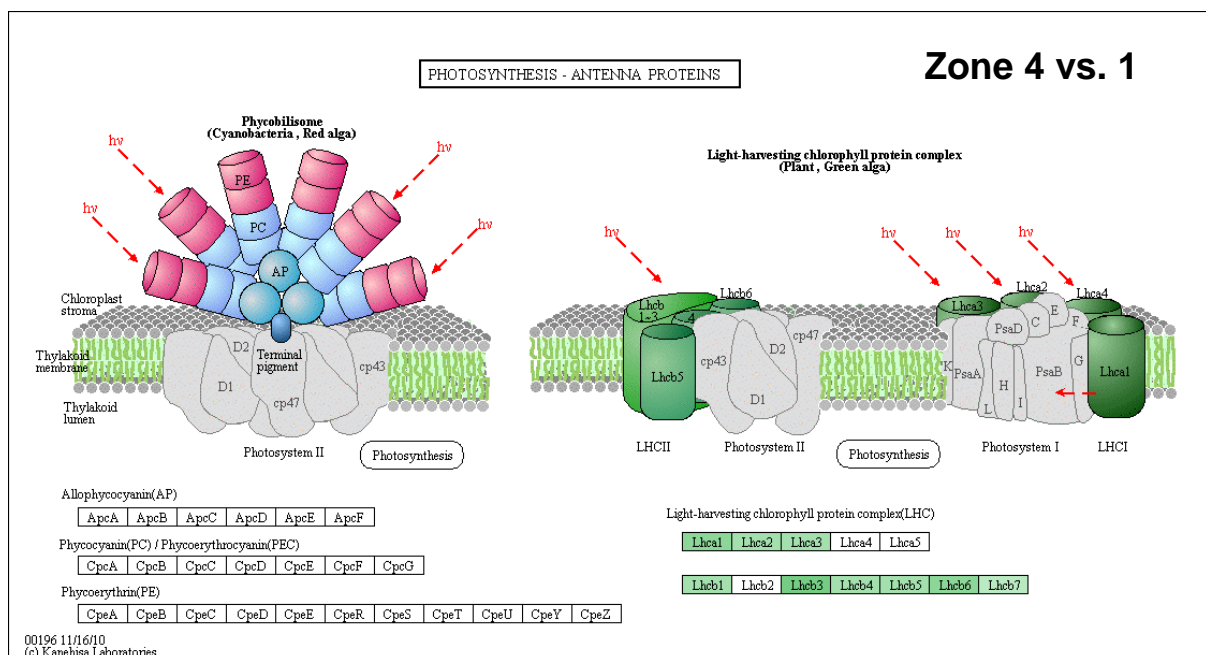



# KAAS Kegg mapping of *L. sativa* cv. Tizian DEG's

Only DEG's with p-adjusted values of 0.05 or smaller and absolute fold changes of 2 or higher are depicted

Log2 fold change

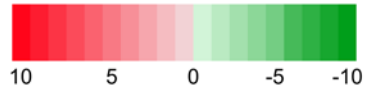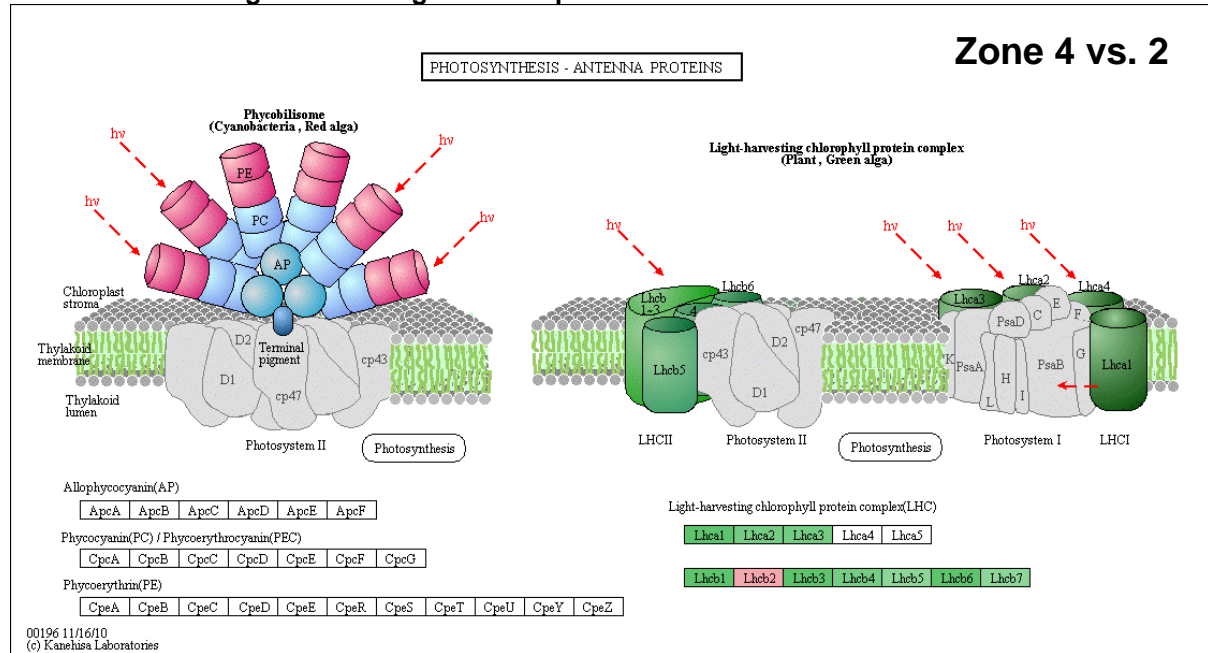





# KAAS Kegg mapping of *L. sativa* cv. Tizian DEG's

Only DEG's with p-adjusted values of 0.05 or smaller and absolute fold changes of 2 or higher are depicted

Log2 fold change

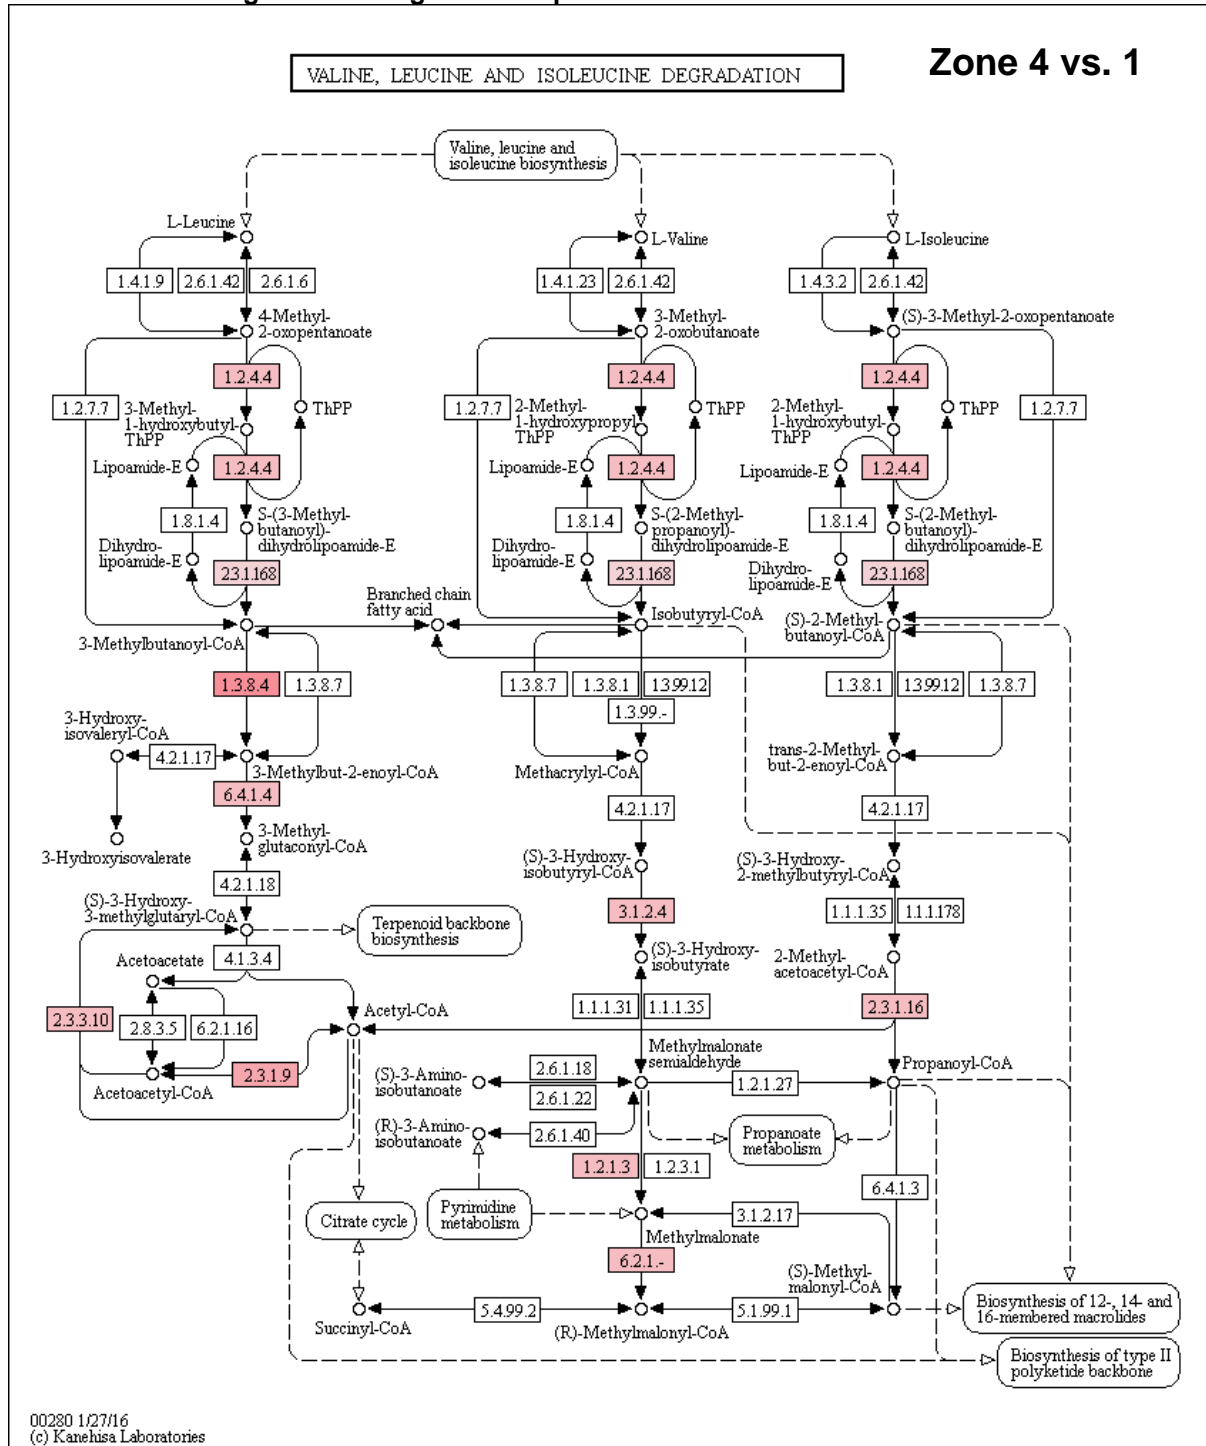

# KAAS Kegg mapping of *L. sativa* cv. Tizian DEG's

Only DEG's with p-adjusted values of 0.05 or smaller and absolute fold changes of 2 or higher are depicted

Log2 fold change

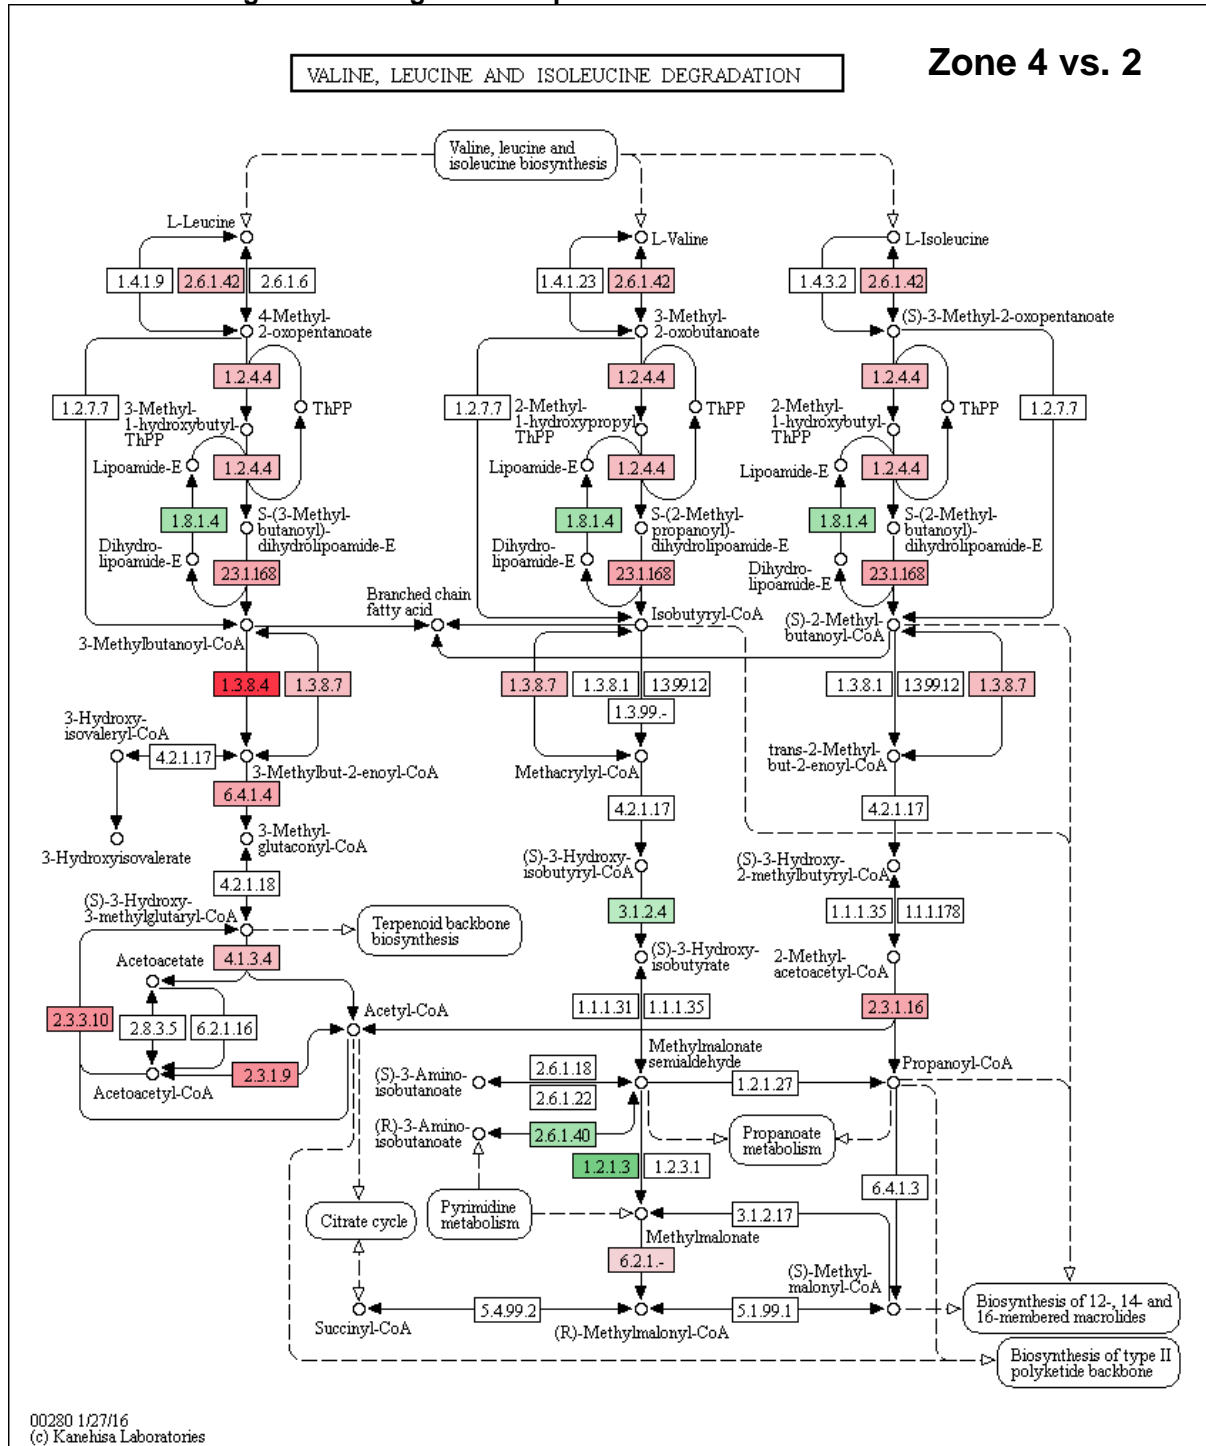

# KAAS Kegg mapping of *L. sativa* cv. Tizian DEG's

Only DEG's with p-adjusted values of 0.05 or smaller and absolute fold changes of 2 or higher are depicted

Log2 fold change

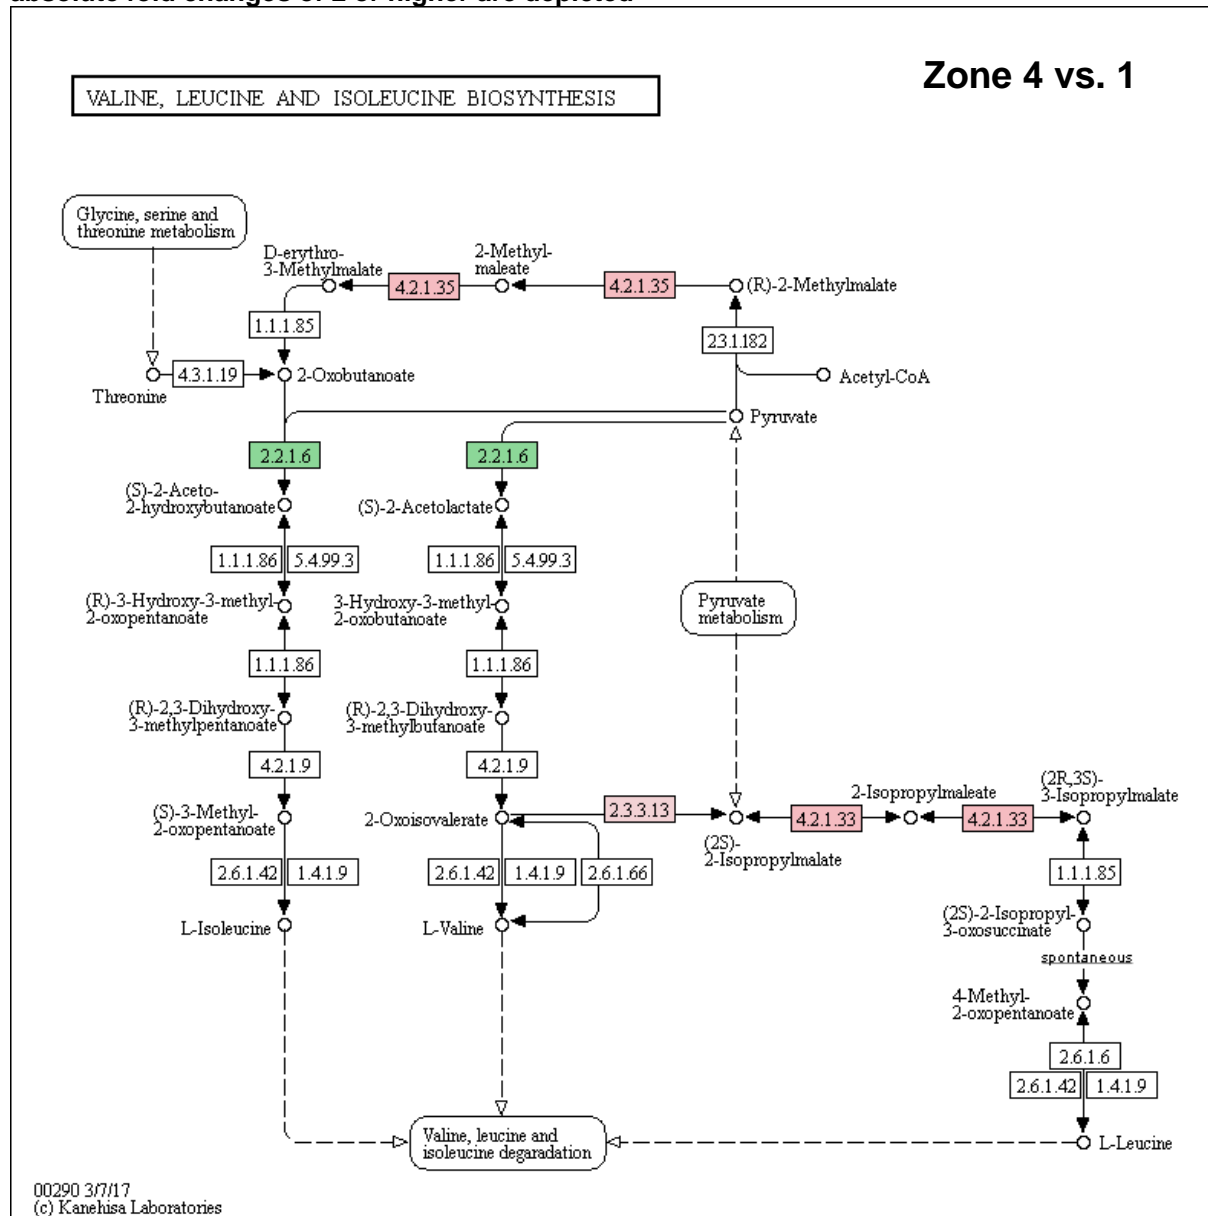

# KAAS Kegg mapping of *L. sativa* cv. Tizian DEG's

Only DEG's with p-adjusted values of 0.05 or smaller and absolute fold changes of 2 or higher are depicted

Log2 fold change



## Zone 4 vs. 2

### VALINE, LEUCINE AND ISOLEUCINE BIOSYNTHESIS

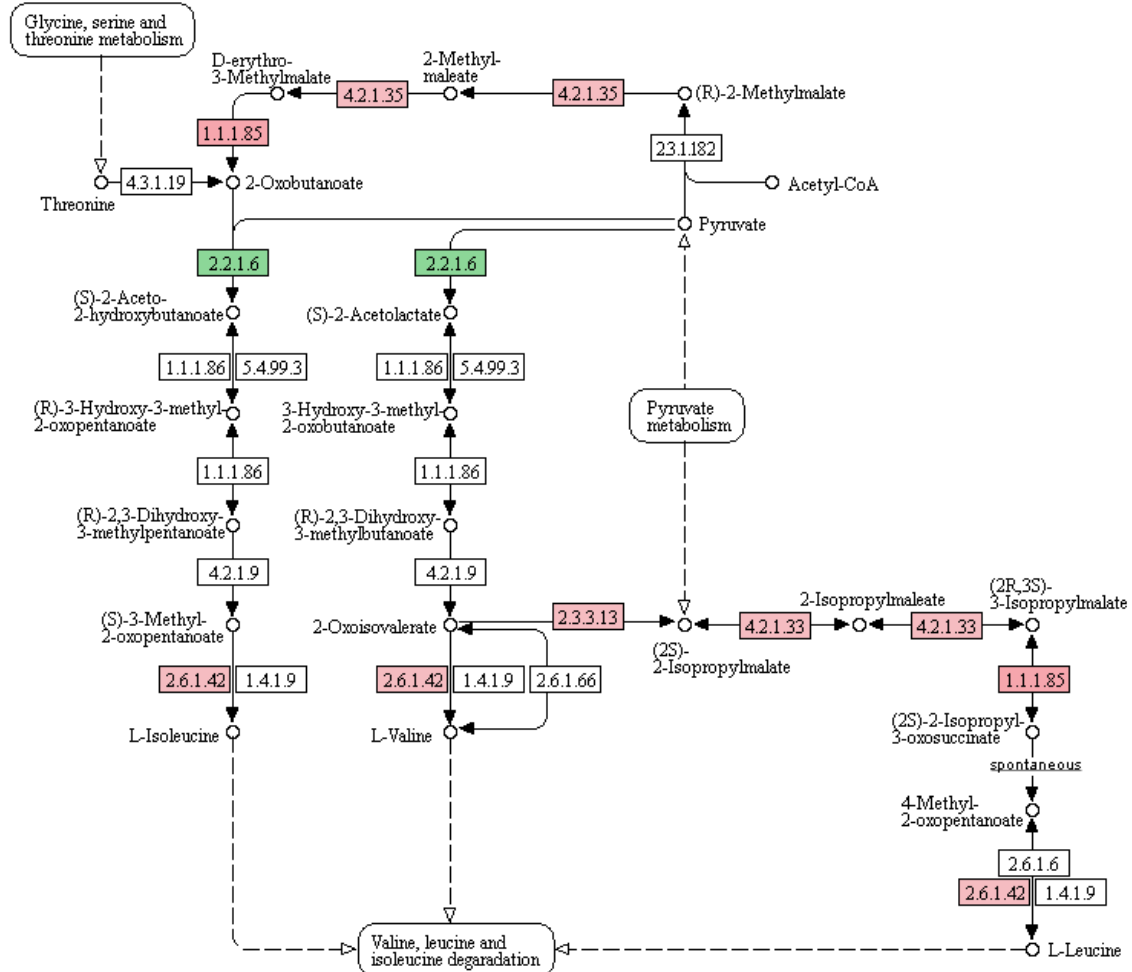

# KAAS Kegg mapping of *L. sativa* cv. Tizian DEG's

Only DEG's with p-adjusted values of 0.05 or smaller and absolute fold changes of 2 or higher are depicted

Log2 fold change



## PHENYLALANINE, TYROSINE AND TRYPTOPHAN BIOSYNTHESIS

Zone 4 vs. 1

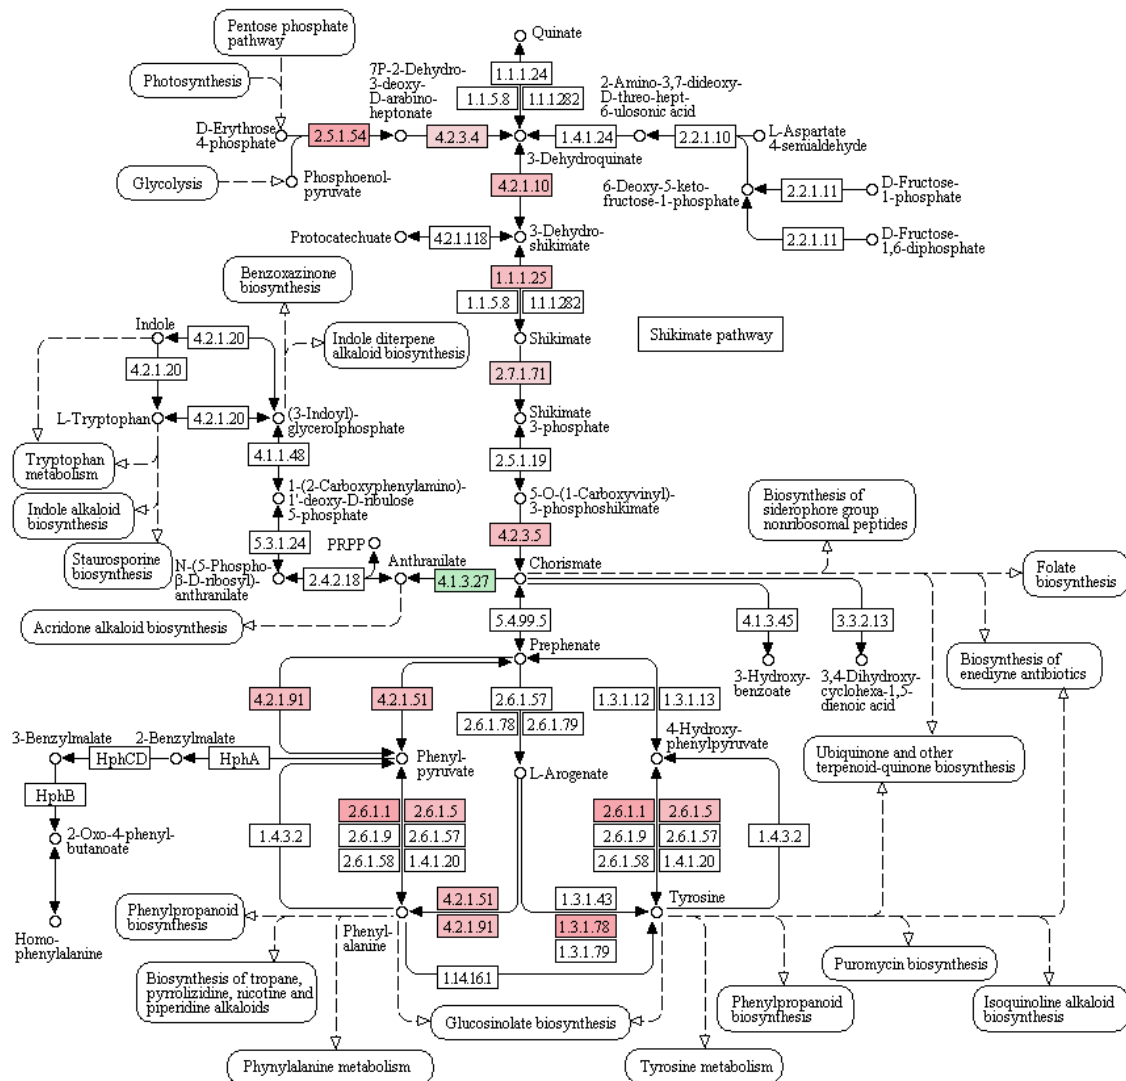





# KAAS Kegg mapping of *L. sativa* cv. Tizian DEG's

Only DEG's with p-adjusted values of 0.05 or smaller and absolute fold changes of 2 or higher are depicted

Log2 fold change

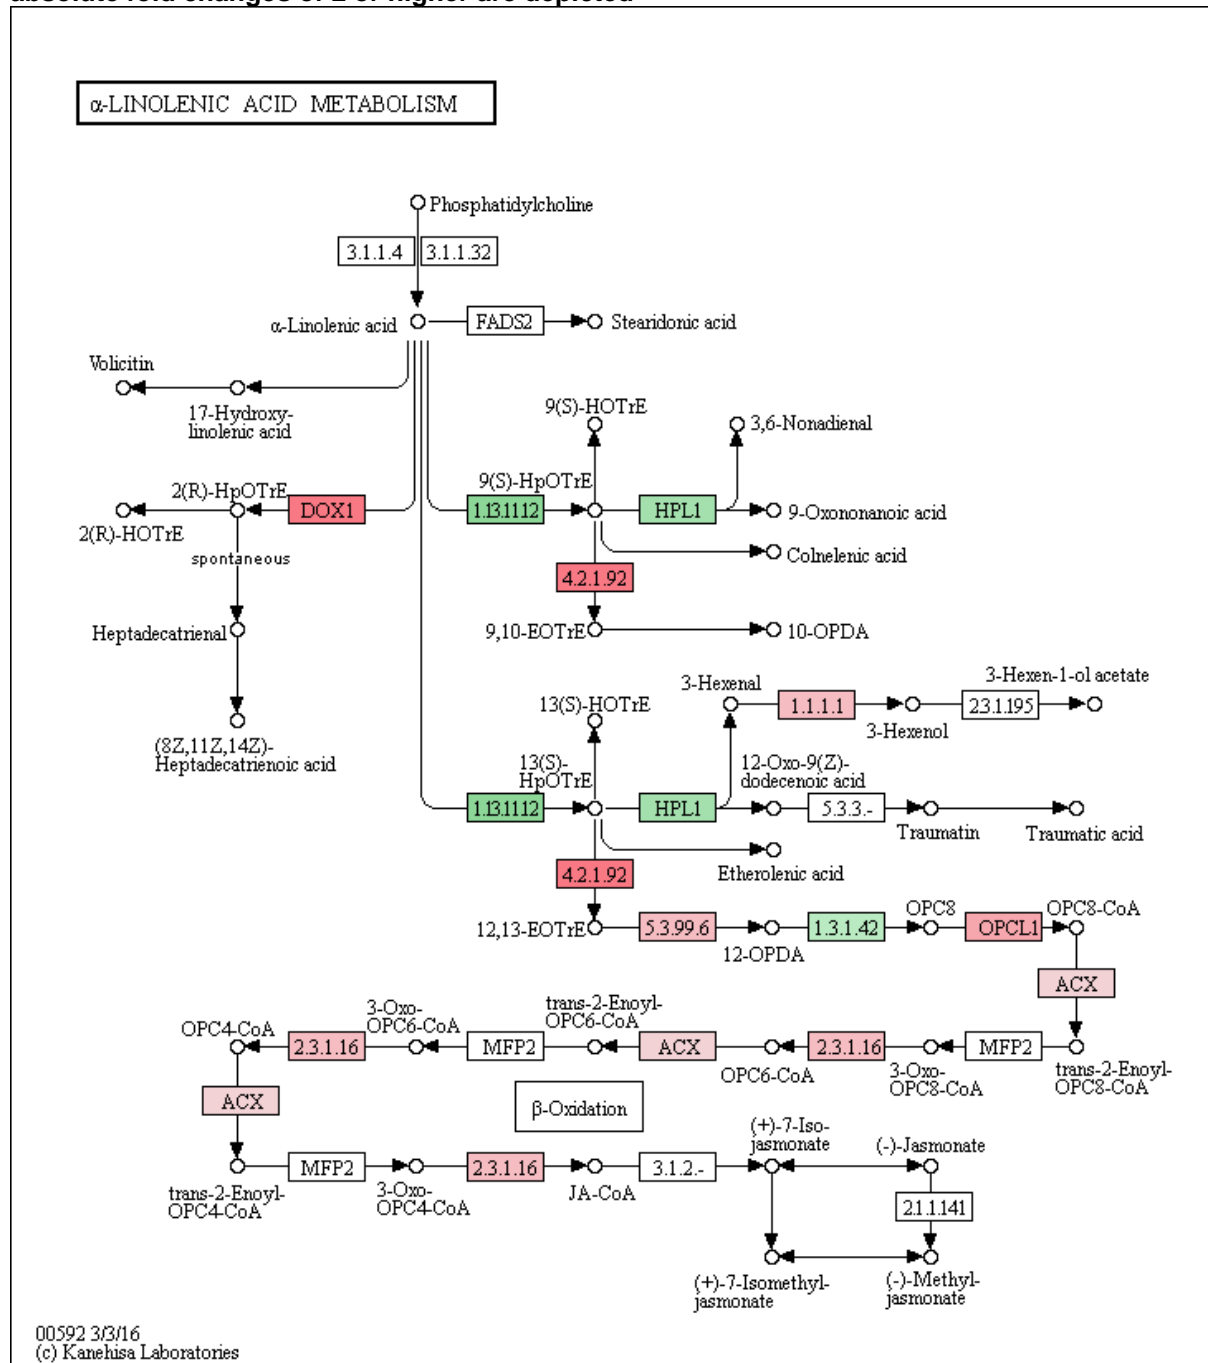

# KAAS Kegg mapping of *L. sativa* cv. Tizian DEG's

Only DEG's with p-adjusted values of 0.05 or smaller and absolute fold changes of 2 or higher are depicted

Log2 fold change



## Zone 4 vs. 2

### $\alpha$ -LINOLENIC ACID METABOLISM

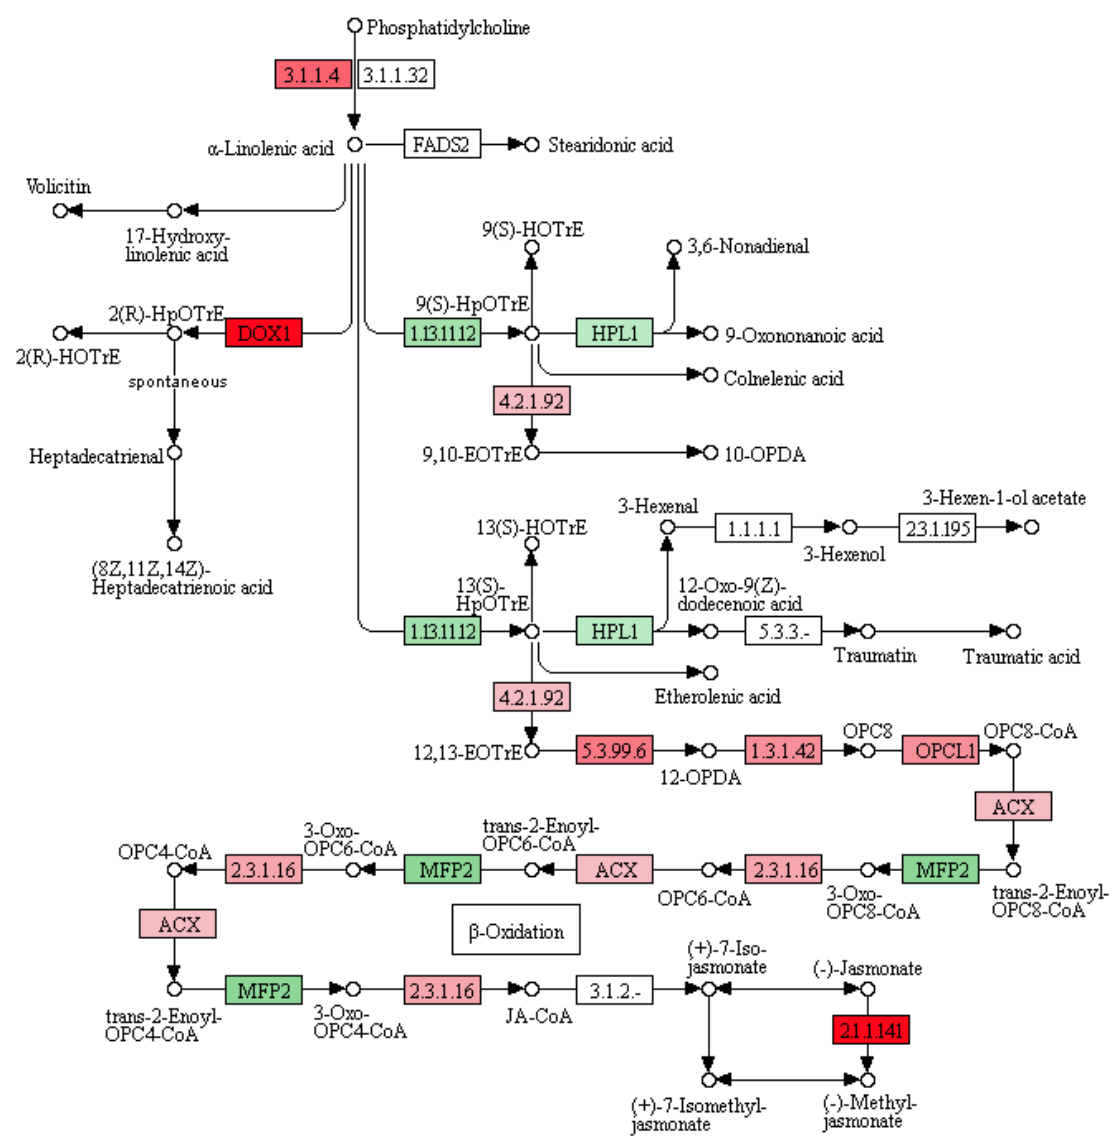

00592 3/3/16  
(c) Kanehisa Laboratories

# KAAS Kegg mapping of *L. sativa* cv. Tizian DEG's

Only DEG's with p-adjusted values of 0.05 or smaller and absolute fold changes of 2 or higher are depicted

Log2 fold change



TERPENOID BACKBONE BIOSYNTHESIS

## Zone 4 vs. 1

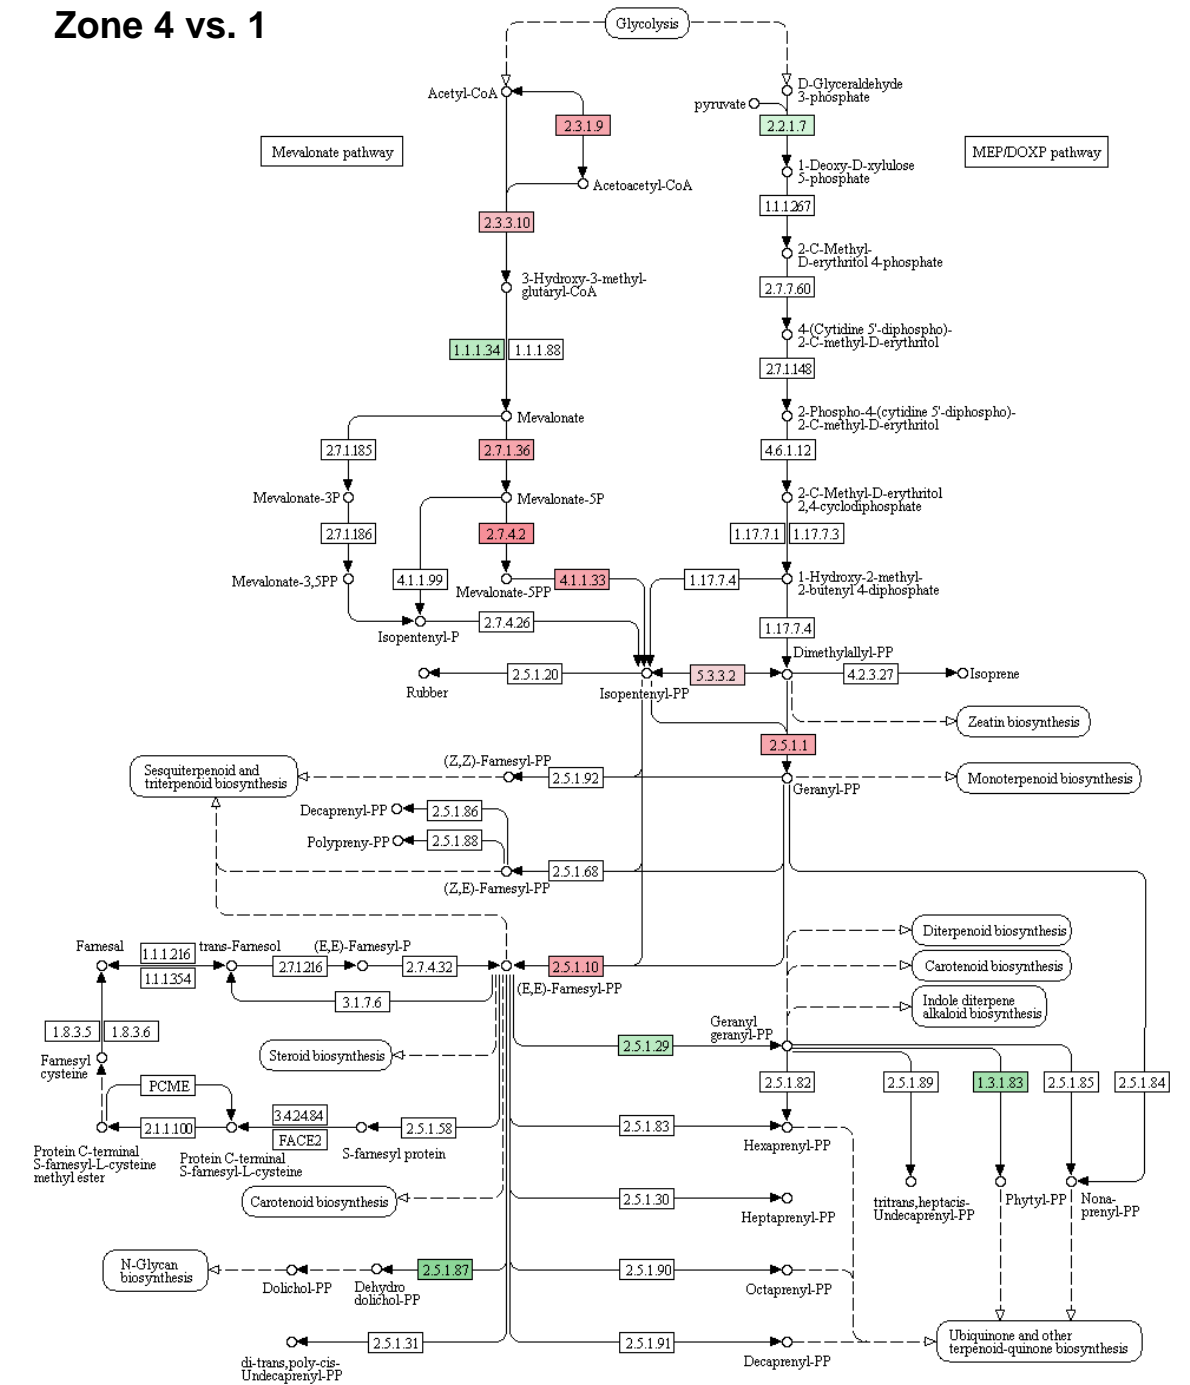

# KAAS Kegg mapping of *L. sativa* cv. Tizian DEG's

Only DEG's with p-adjusted values of 0.05 or smaller and absolute fold changes of 2 or higher are depicted

Log2 fold change

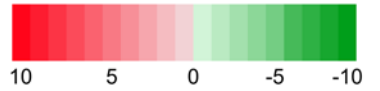

## TERPENOID BACKBONE BIOSYNTHESIS

### Zone 4 vs. 2

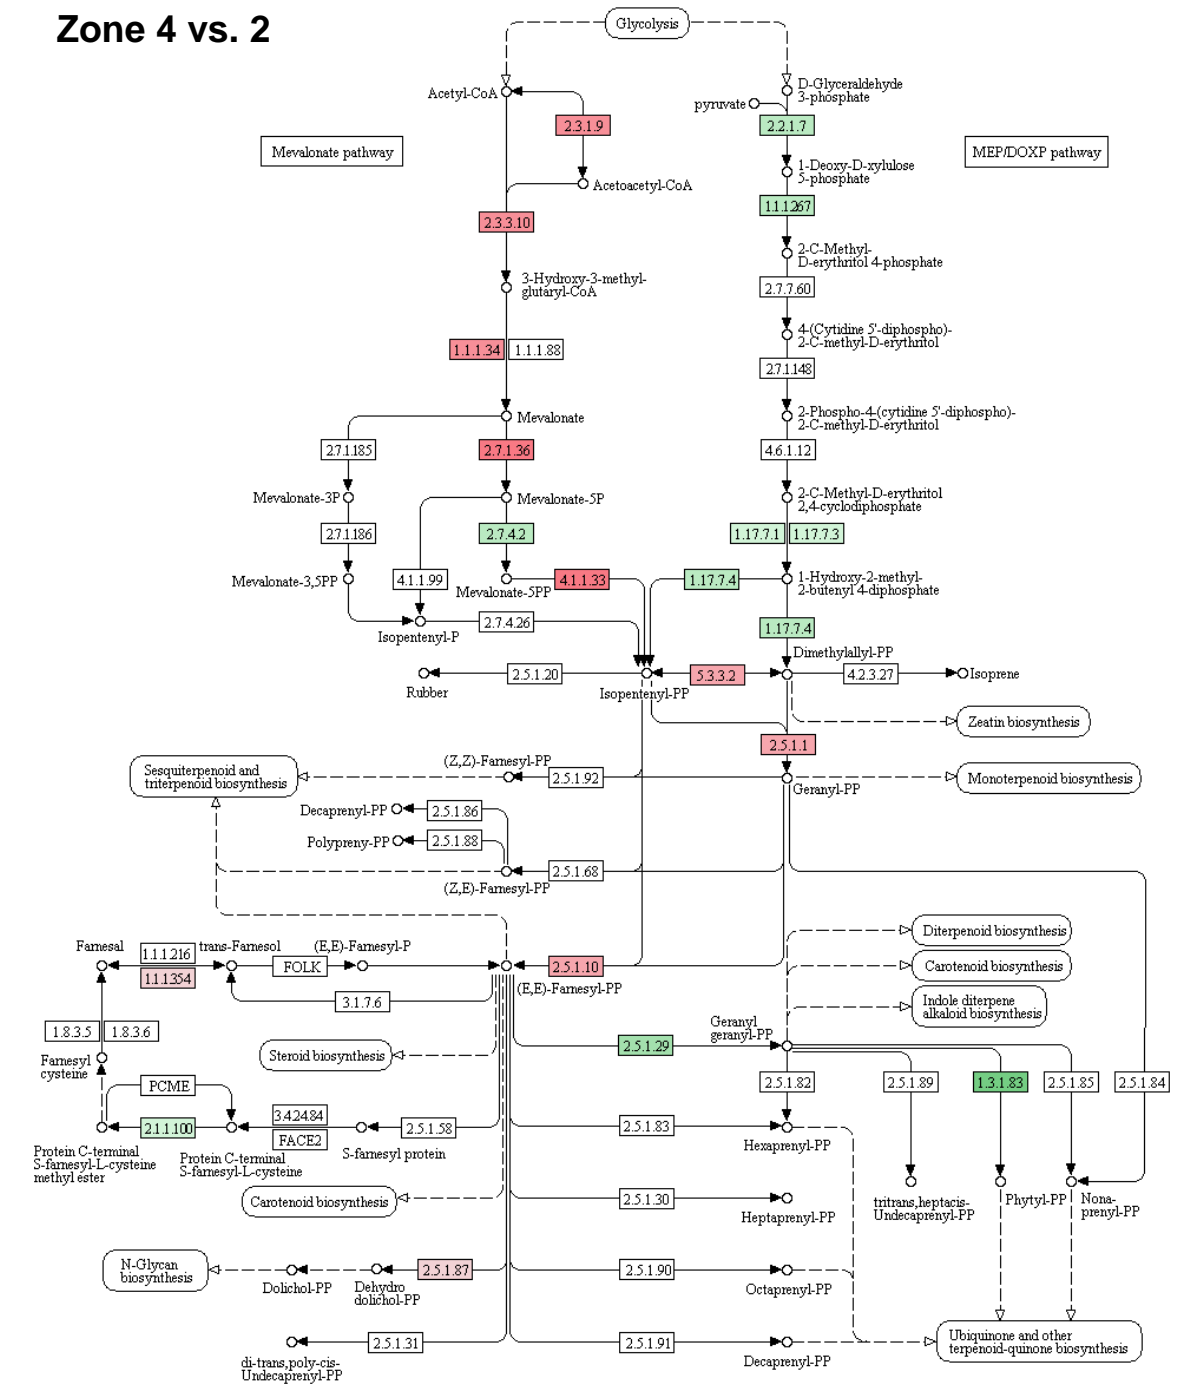

# KAAS Kegg mapping of *L. sativa* cv. Tizian DEG's

Only DEG's with p-adjusted values of 0.05 or smaller and absolute fold changes of 2 or higher are depicted

Log2 fold change

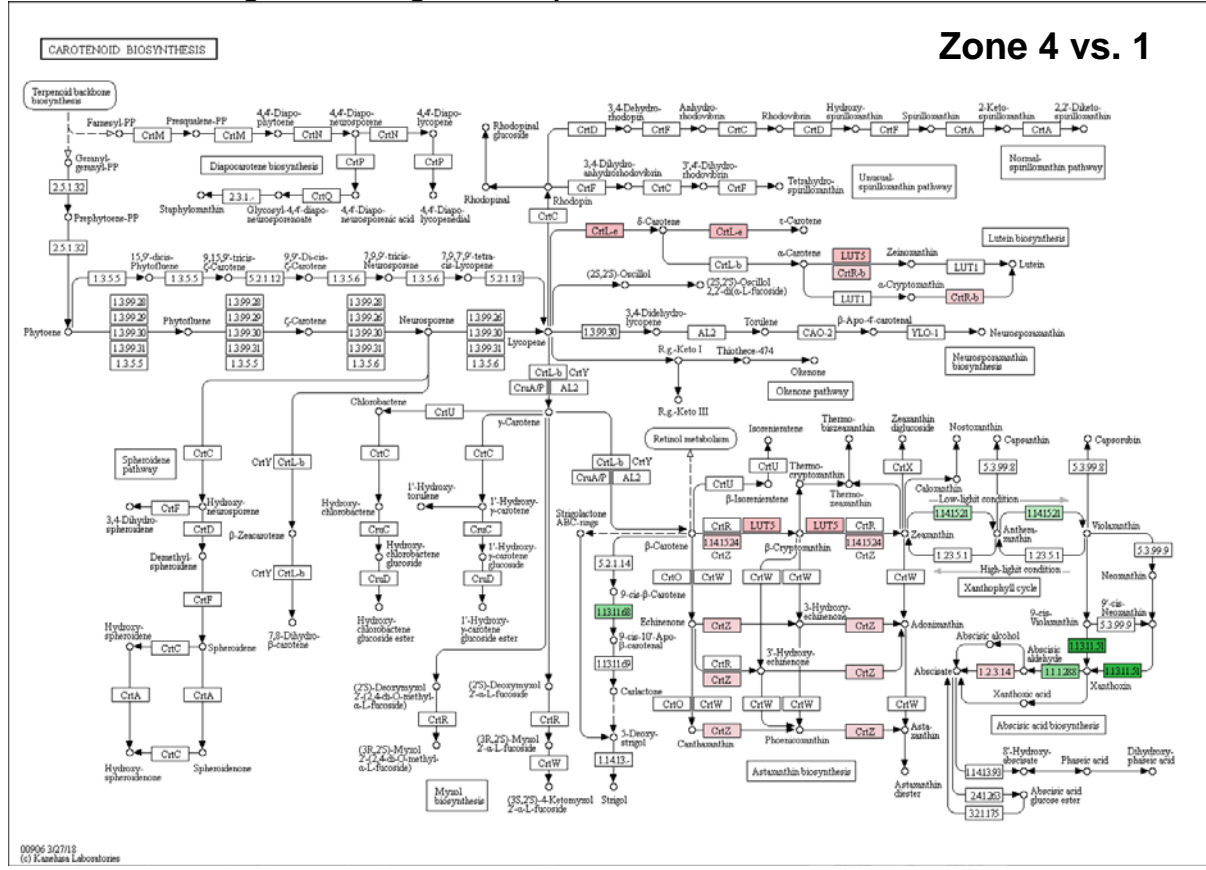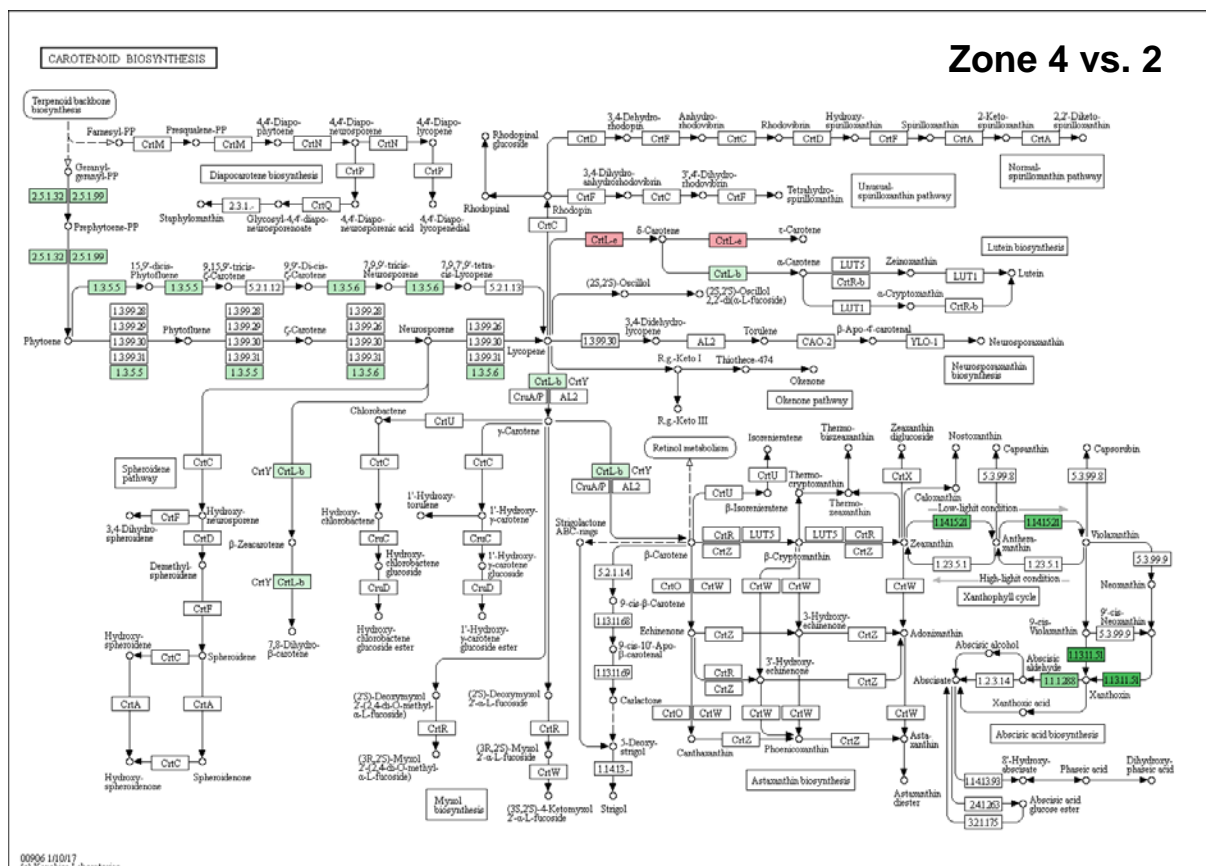

# KAAS Kegg mapping of *L. sativa* cv. Tizian DEG's

Only DEG's with p-adjusted values of 0.05 or smaller and absolute fold changes of 2 or higher are depicted

Log2 fold change

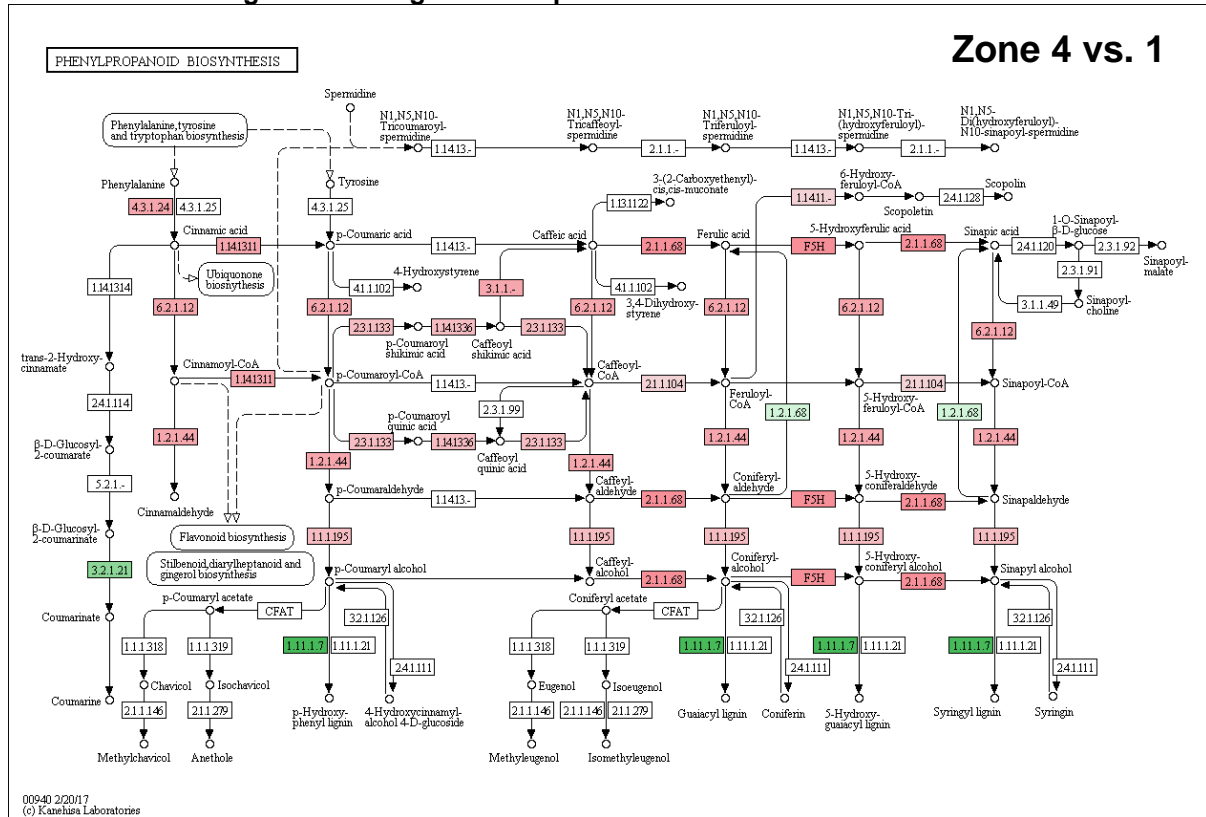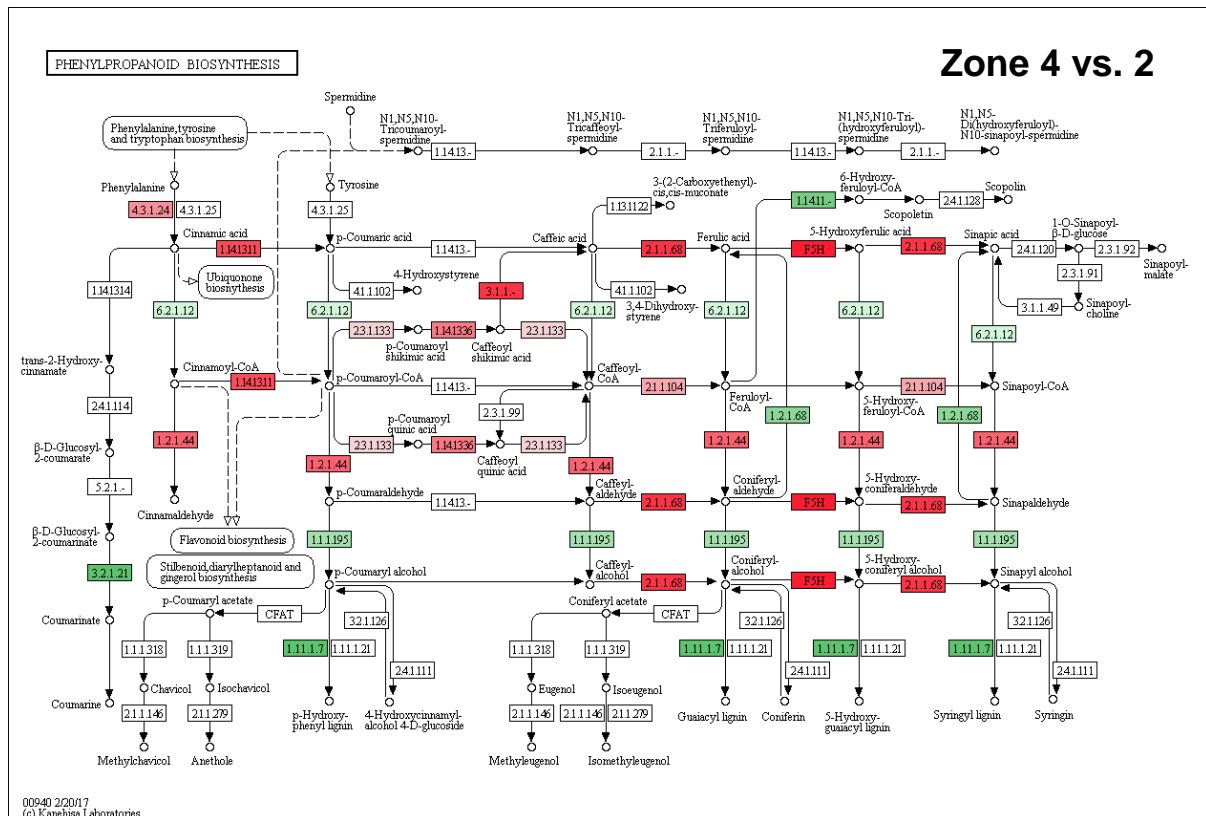





# KAAS Kegg mapping of *L. sativa* cv. Tizian DEG's

Only DEG's with p-adjusted values of 0.05 or smaller and absolute fold changes of 2 or higher are depicted

Log2 fold change

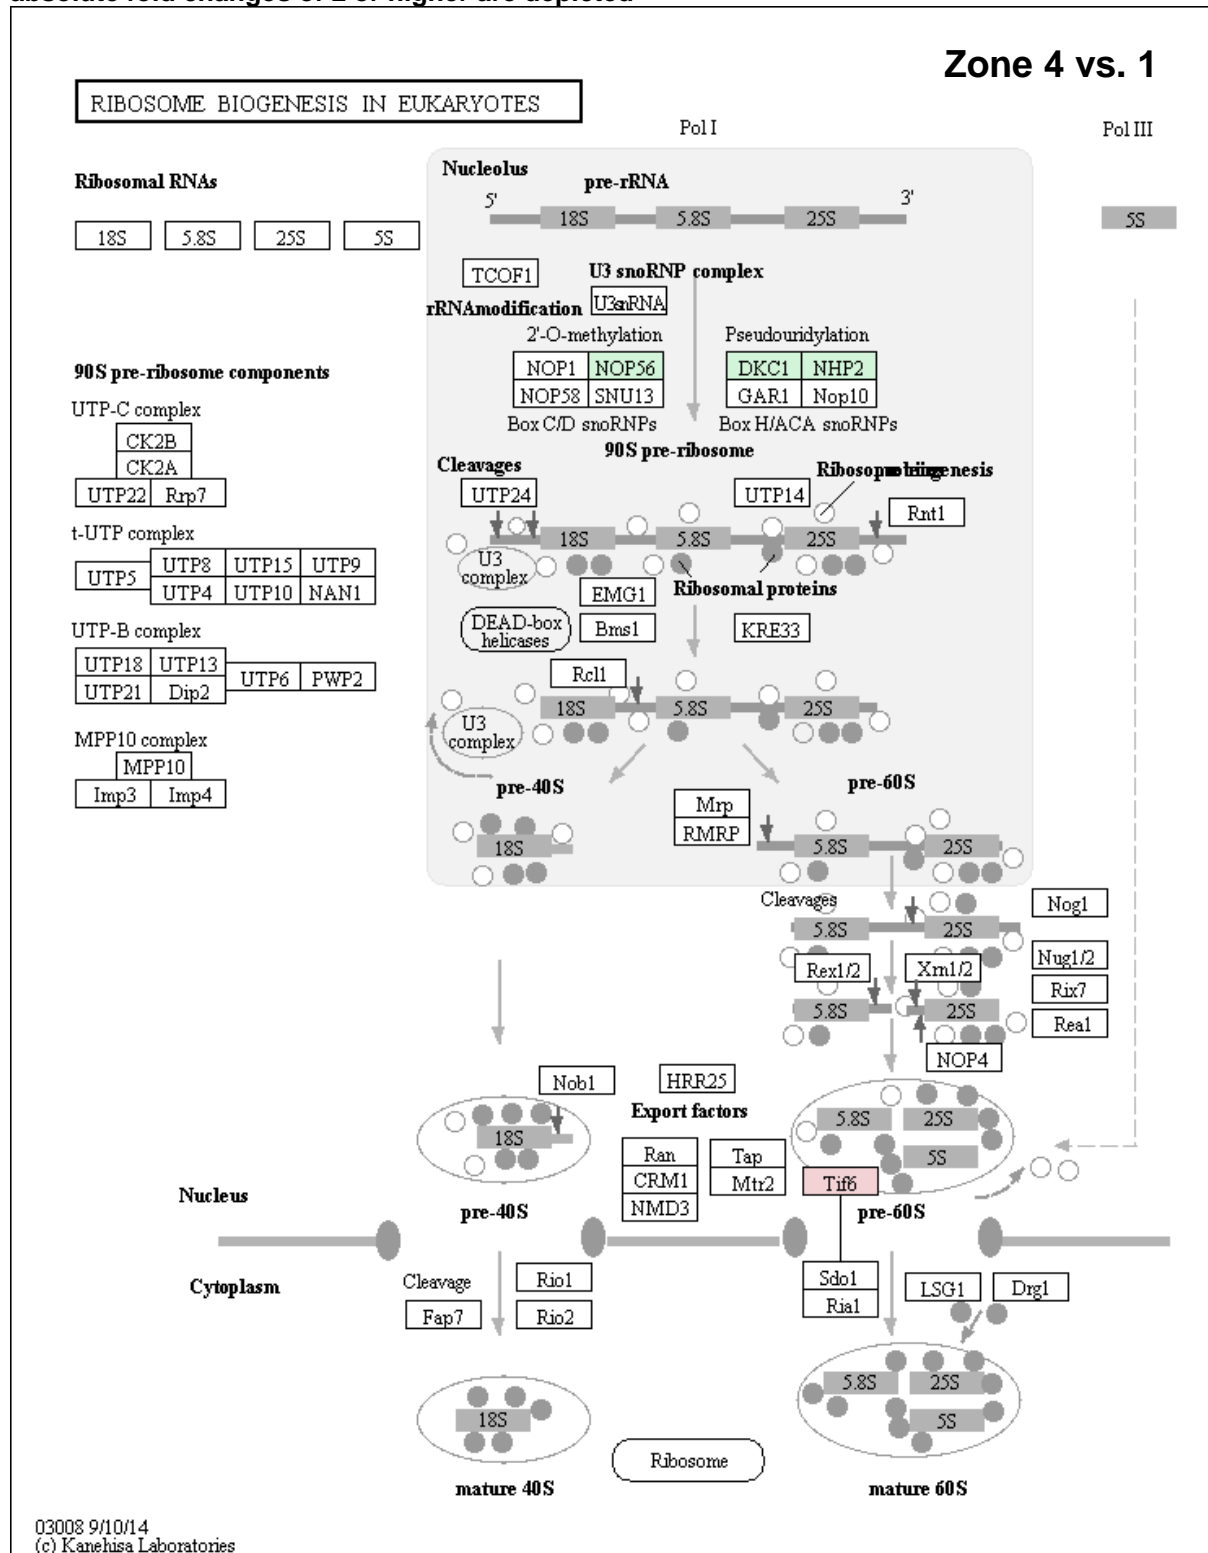

# KAAS Kegg mapping of *L. sativa* cv. Tizian DEG's

Only DEG's with p-adjusted values of 0.05 or smaller and absolute fold changes of 2 or higher are depicted

Log2 fold change



## Zone 4 vs. 2

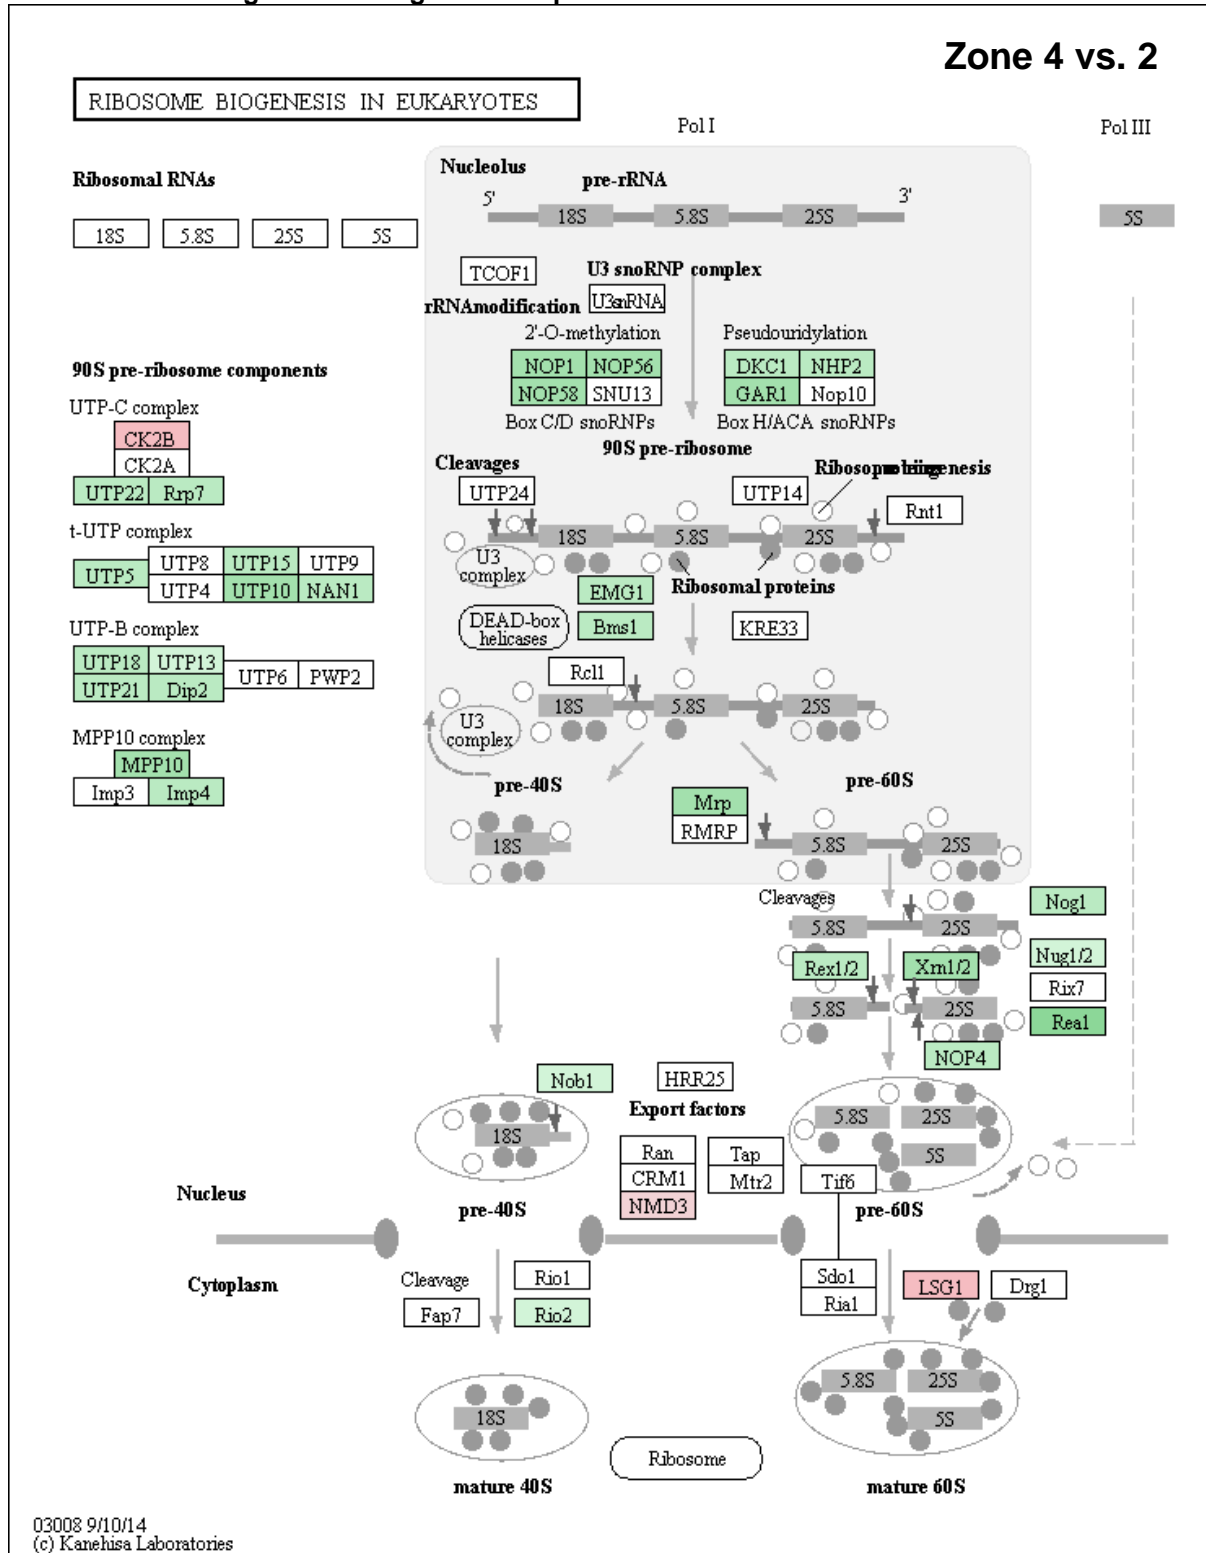

# KAAS Kegg mapping of *L. sativa* cv. Tizian DEG's

Only DEG's with p-adjusted values of 0.05 or smaller and absolute fold changes of 2 or higher are depicted

Log2 fold change

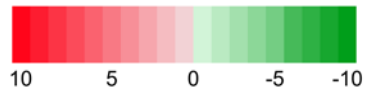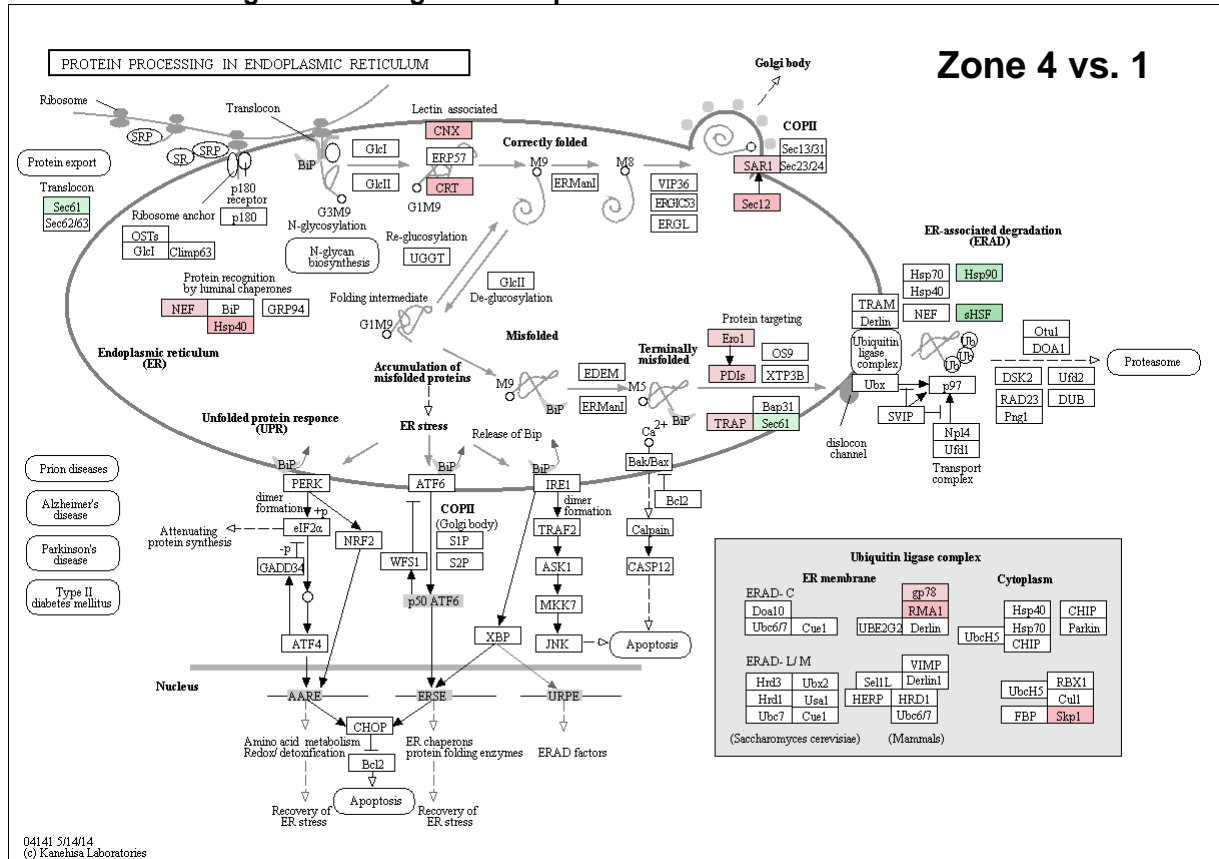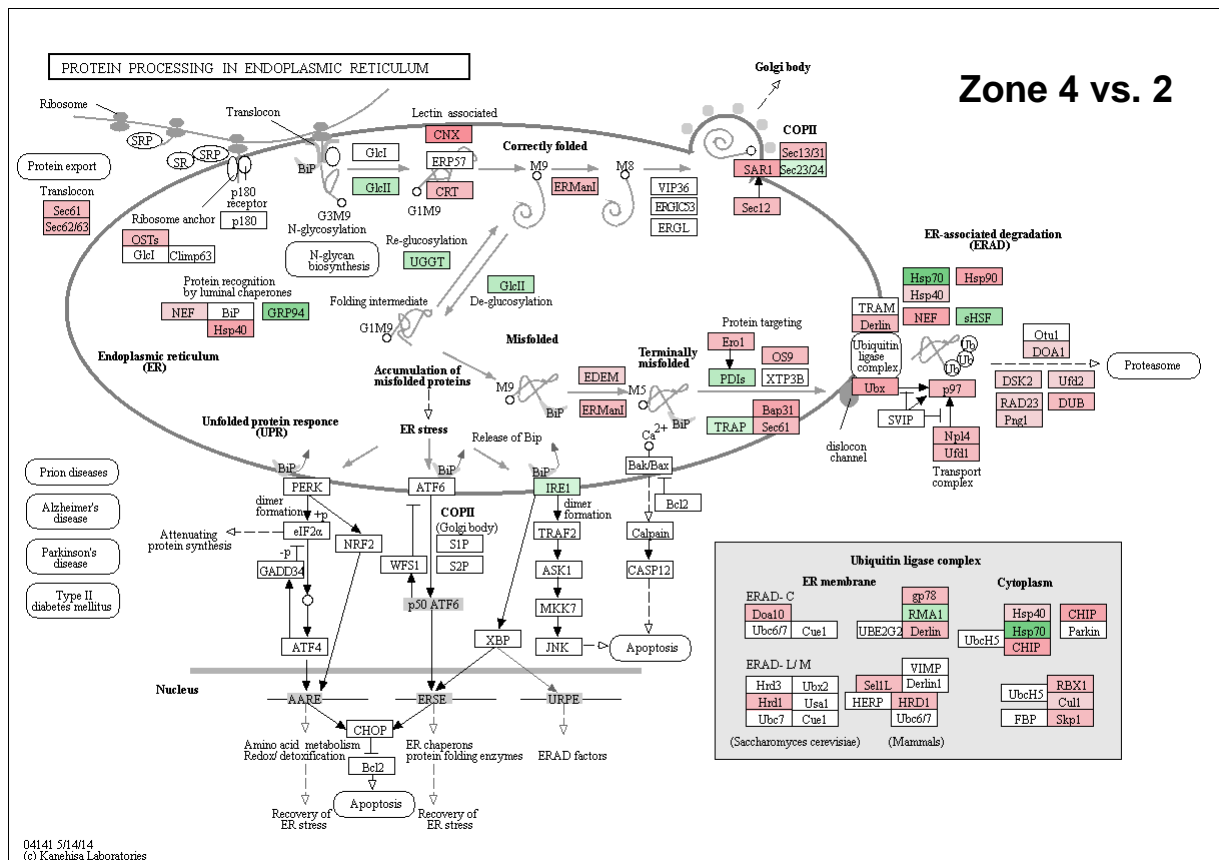

# KAAS Kegg mapping of *L. sativa* cv. Tizian DEG's

Only DEG's with p-adjusted values of 0.05 or smaller and absolute fold changes of 2 or higher are depicted

Log2 fold change

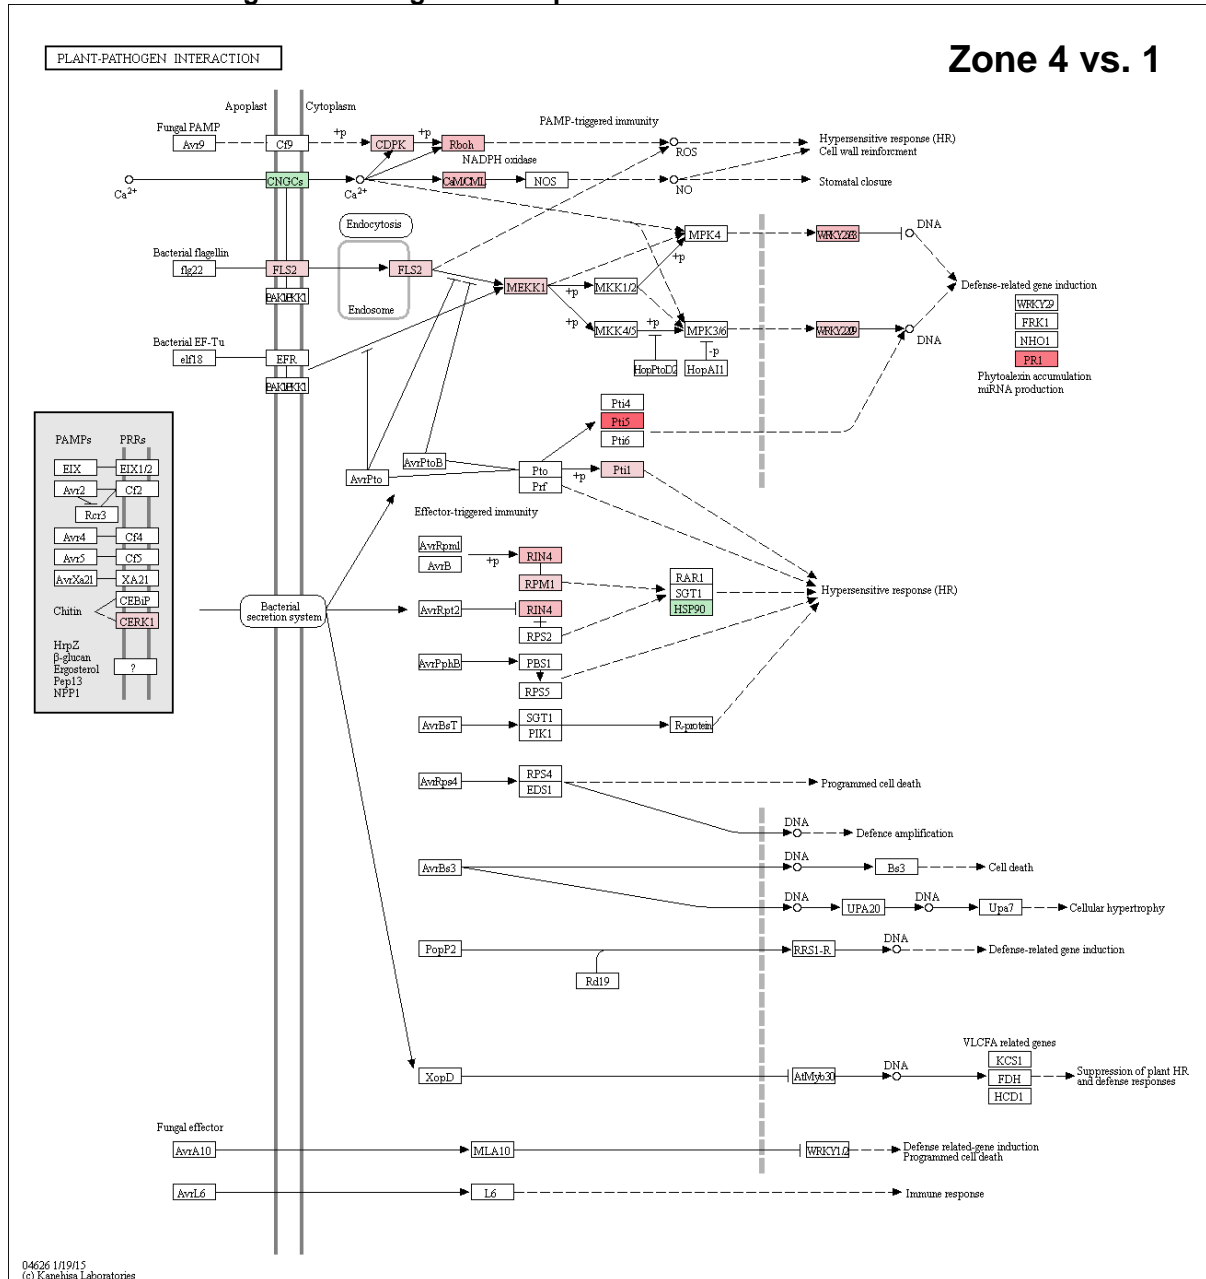

# KAAS Kegg mapping of *L. sativa* cv. Tizian DEG's

Only DEG's with p-adjusted values of 0.05 or smaller and absolute fold changes of 2 or higher are depicted

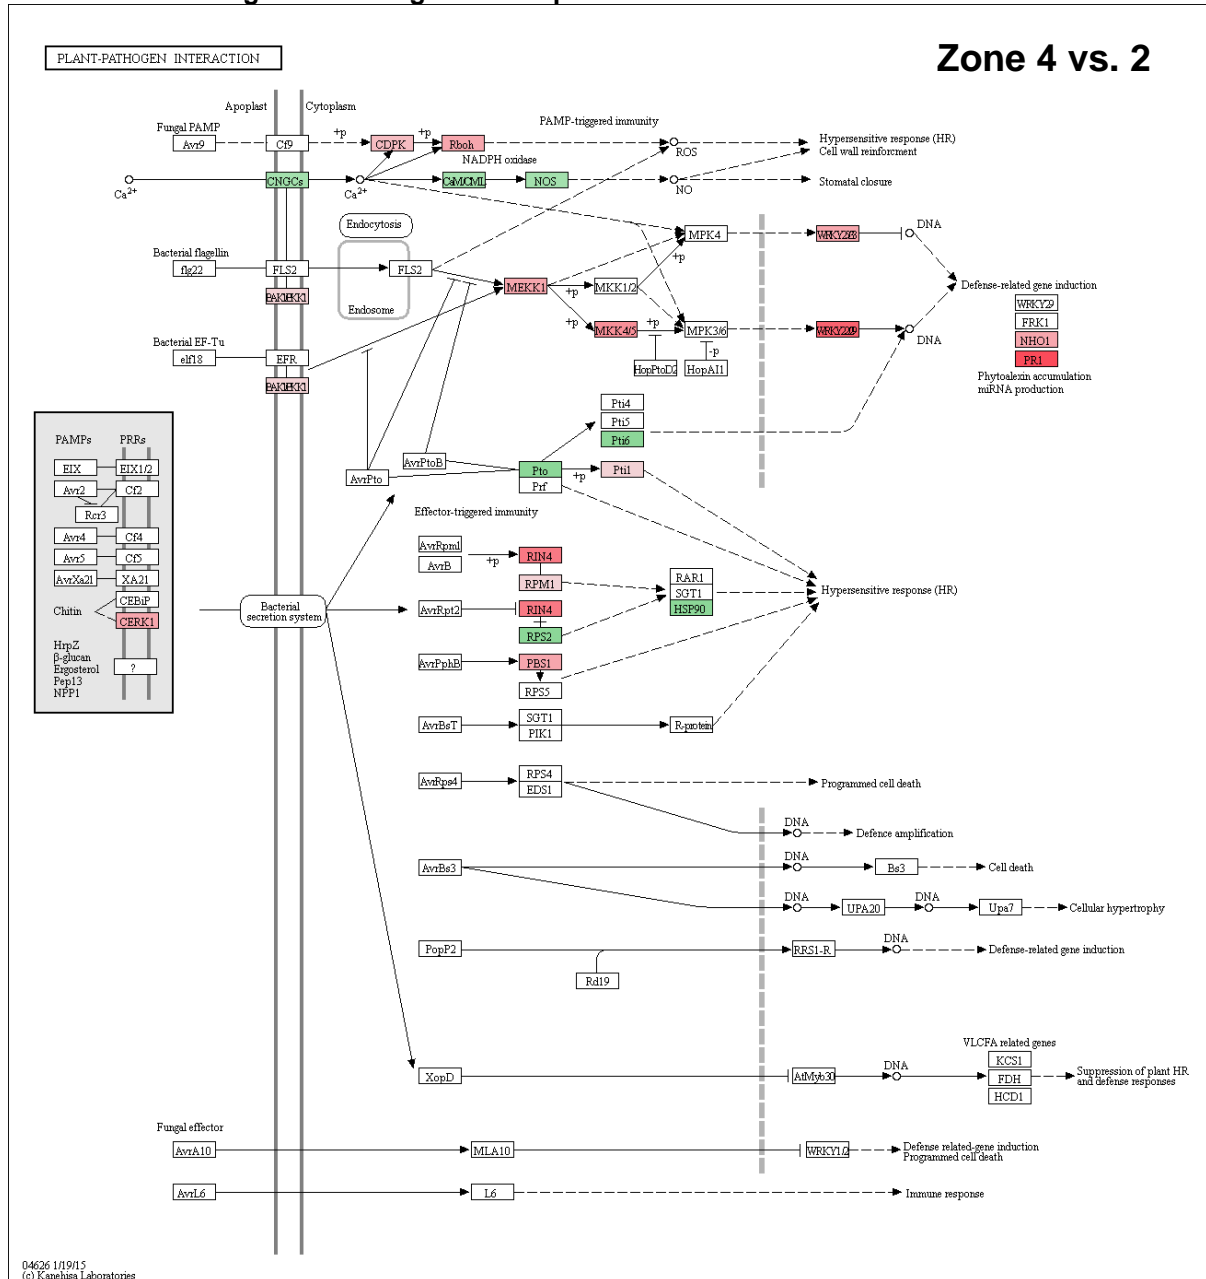

Log2 fold change



# KAAS Kegg mapping of *L. sativa* cv. Tizian DEG's

Only DEG's with p-adjusted values of 0.05 or smaller and absolute fold changes of 2 or higher are depicted

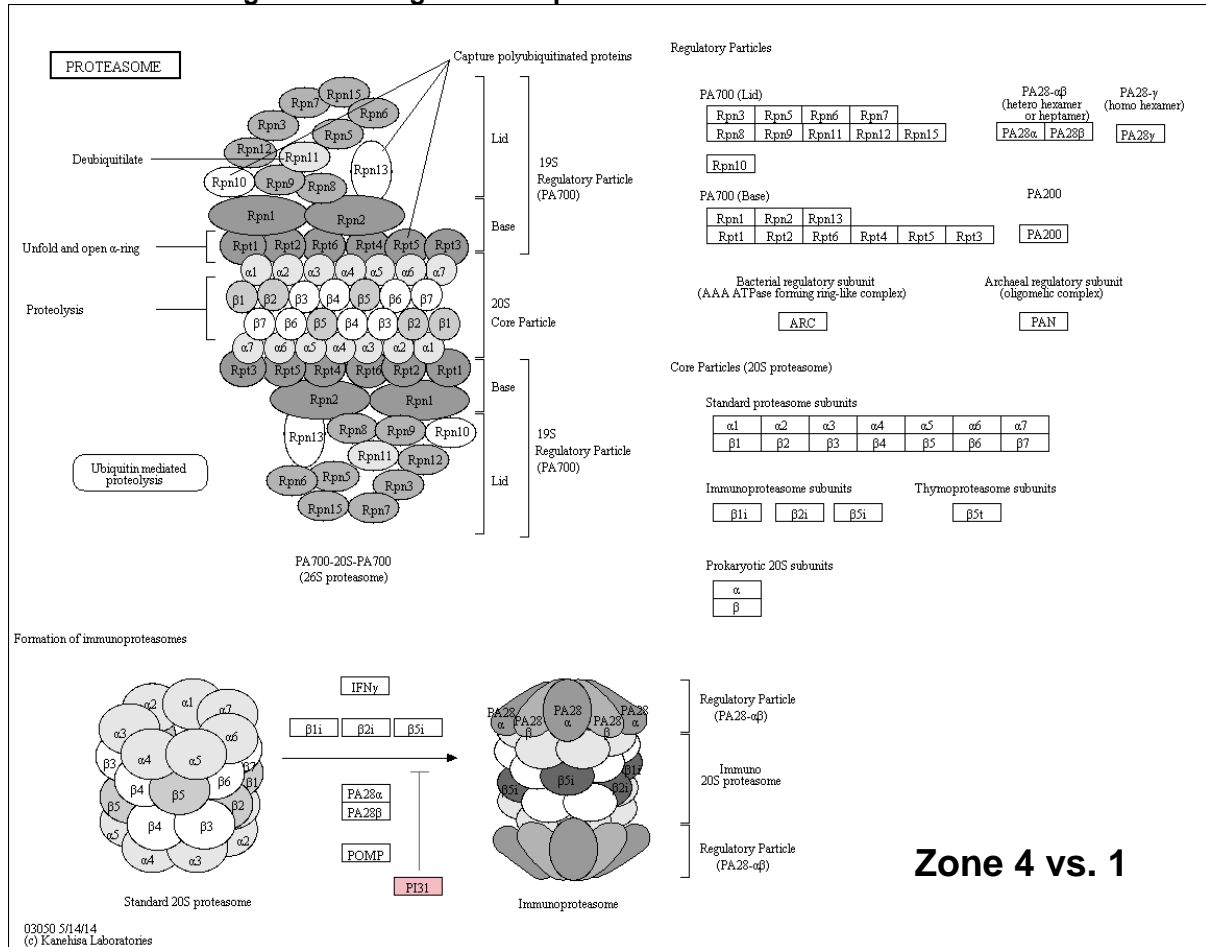

# KAAS Kegg mapping of *L. sativa* cv. Tizian DEG's

Only DEG's with p-adjusted values of 0.05 or smaller and absolute fold changes of 2 or higher are depicted

Log2 fold change

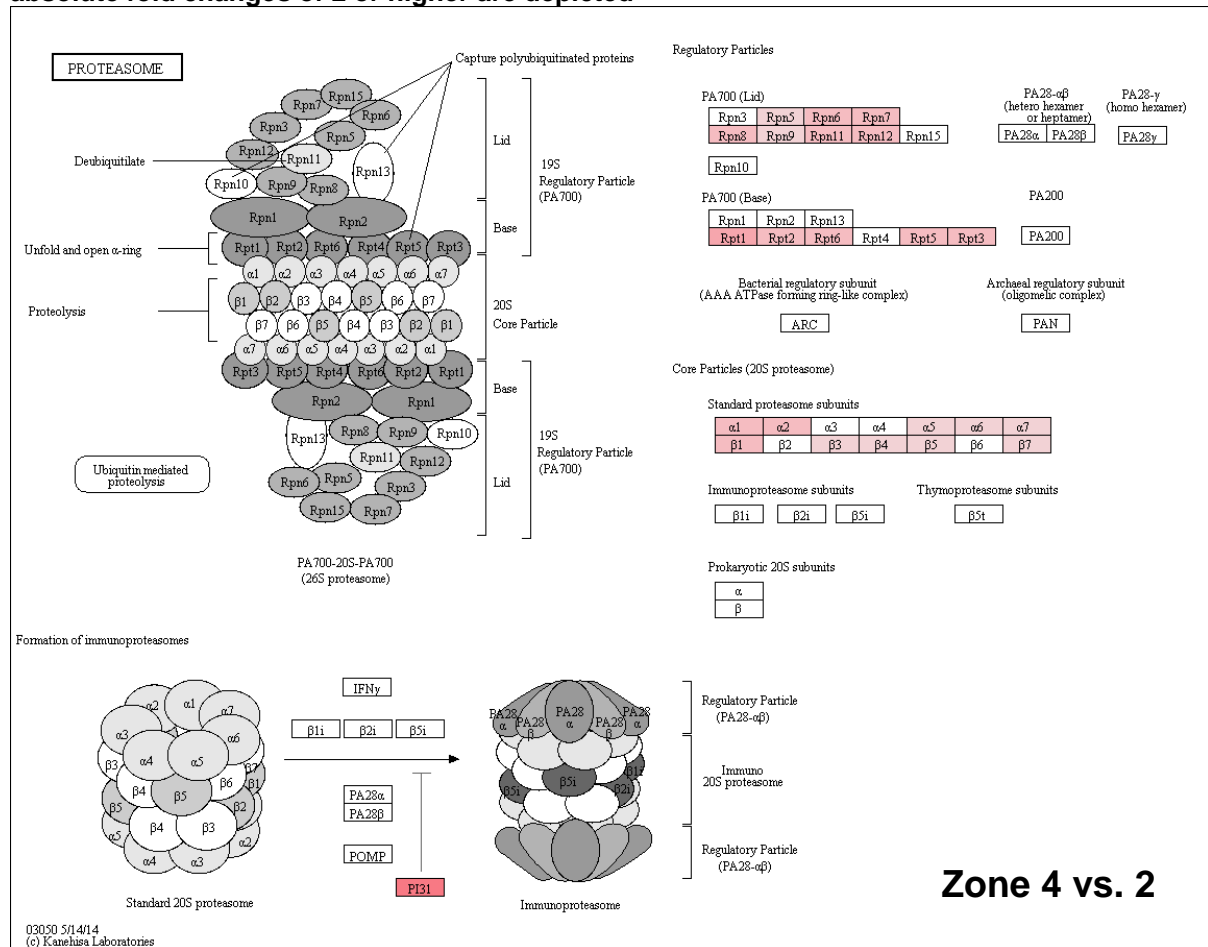

Supplementary Figure S3: KEGG Transcriptome mappings of DEGs based on fold changes. Only DEGs with log2 fold changes of 1 or more and p-adj values of 0.05 or less are depicted. KEGG maps were obtained from [www.kegg.jp](http://www.kegg.jp)<sup>40-43</sup>
